# 1 **A human antibody that broadly neutralizes betacoronaviruses protects** 2 **against SARS-CoV-2 by blocking the fusion machinery**

3 Dora Pinto<sup>1\*</sup>, Maximilian M. Sauer<sup>2\*</sup>, Nadine Czudnochowski<sup>3\*</sup>, Jun Siong Low<sup>4\*</sup>, M. Alejandra Tortorici<sup>2</sup>,  
4 Michael P. Housley<sup>3</sup>, Julia Noack<sup>3</sup>, Alexandra C. Walls<sup>2</sup>, John E. Bowen<sup>2</sup>, Barbara Guarino<sup>1</sup>, Laura E.  
5 Rosen<sup>3</sup>, Julia di Iulio<sup>3</sup>, Josipa Jerak<sup>4</sup>, Hannah Kaiser<sup>3</sup>, Saiful Islam<sup>3</sup>, Stefano Jaconi<sup>1</sup>, Nicole Sprugasci<sup>1</sup>,  
6 Katja Culap<sup>1</sup>, Rana Abdelnabi<sup>5</sup>, Caroline Foo<sup>5</sup>, Lotte Coelmont<sup>5</sup>, Istvan Bartha<sup>1</sup>, Siro Bianchi<sup>1</sup>, Chiara  
7 Silacci-Fregni<sup>1</sup>, Jessica Bassi<sup>1</sup>, Roberta Marzi<sup>1</sup>, Eneida Vetti<sup>1</sup>, Antonino Cassotta<sup>4</sup>, Alessandro Ceschi<sup>6,7,8,9</sup>,  
8 Paolo Ferrari<sup>9,10,11</sup>, Pietro E. Cippà<sup>10,12</sup>, Olivier Giannini<sup>9,10</sup>, Samuele Ceruti<sup>13</sup>, Christian Garzoni<sup>14</sup>, Agostino  
9 Riva<sup>15</sup>, Fabio Benigni<sup>1</sup>, Elisabetta Cameroni<sup>1</sup>, Luca Piccoli<sup>1</sup>, Matteo S. Pizzuto<sup>1</sup>, Megan Smithey<sup>3</sup>, David  
10 Hong<sup>3</sup>, Amalio Telenti<sup>3</sup>, Florian A. Lempp<sup>3</sup>, Johan Neyts<sup>5</sup>, Colin Havenar-Daughton<sup>3</sup>, Antonio  
11 Lanzavecchia<sup>1</sup>, Federica Sallusto<sup>4,16</sup>, Gyorgy Snell<sup>3</sup>, Herbert W. Virgin<sup>3,17,18</sup>, Martina Beltramello<sup>1</sup>, Davide  
12 Corti<sup>1#</sup> and David Veessler<sup>2#</sup>

13  
14 <sup>1</sup>Humabs Biomed SA, a subsidiary of Vir Biotechnology, 6500 Bellinzona, Switzerland  
15 <sup>2</sup>Department of Biochemistry, University of Washington, Seattle, Washington 98195, USA  
16 <sup>3</sup>Vir Biotechnology, San Francisco, CA 94158, USA  
17 <sup>4</sup>Institute for Research in Biomedicine, Università della Svizzera italiana, 6500 Bellinzona, Switzerland  
18 <sup>5</sup>Rega Institute for Medical Research, Laboratory of Virology and Chemotherapy, KU Leuven, 3000 Leuven, Belgium  
19 <sup>6</sup>Clinical Trial Unit, Ente Ospedaliero Cantonale, 6900 Lugano, Switzerland  
20 <sup>7</sup>Division of Clinical Pharmacology and Toxicology, Institute of Pharmacological Sciences of Southern Switzerland,  
21 Ente Ospedaliero Cantonale, 6900 Lugano, Switzerland  
22 <sup>8</sup>Department of Clinical Pharmacology and Toxicology, University Hospital Zurich, 8091 Zurich, Switzerland  
23 <sup>9</sup>Faculty of Biomedical Sciences, Università della Svizzera italiana, 6900 Lugano, Switzerland  
24 <sup>10</sup>Department of Medicine, Ente Ospedaliero Cantonale, 6500 Bellinzona, Switzerland  
25 <sup>11</sup>Clinical School, University of New South Wales, 2052 Sydney, Australia  
26 <sup>12</sup>Faculty of Medicine, University of Zurich, 8057 Zurich, Switzerland  
27 <sup>13</sup>Intensive Care Unit, Clinica Luganese Moncucco, 6900 Lugano, Switzerland  
28 <sup>14</sup>Clinic of Internal Medicine and Infectious Diseases, Clinica Luganese Moncucco, 6900 Lugano, Switzerland  
29 <sup>15</sup>III Division of Infectious Diseases, ASST Fatebenefratelli Sacco, Luigi Sacco Hospital, 20157 Milan, Italy  
30 <sup>16</sup>Institute of Microbiology, ETH Zurich, 8093 Zurich, Switzerland  
31 <sup>17</sup>UT Southwestern Medical Center, Dallas, TX, 75390 USA  
32 <sup>18</sup>Washington University School of Medicine, St. Louis, MO, 63110 USA

33  
34  
35 \*These authors contributed equally

36  
37 #Correspondence: [dveessler@uw.edu](mailto:dveessler@uw.edu), [dcorti@vir.bio](mailto:dcorti@vir.bio)  
38

39 **The repeated spillovers of  $\beta$ -coronaviruses in humans along with the rapid emergence of**  
40 **SARS-CoV-2 escape variants highlight the need to develop broad coronavirus therapeutics**  
41 **and vaccines. Five monoclonal antibodies (mAbs) were isolated from COVID-19**  
42 **convalescent individuals and found to cross-react with multiple  $\beta$ -coronavirus spike (S)**  
43 **glycoproteins by targeting the stem helix. One of these mAbs, S2P6, cross-reacts with**  
44 **more than twenty human and animal  $\beta$ -coronavirus S glycoproteins and broadly**  
45 **neutralizes SARS-CoV-2 and pseudotyped viruses from the sarbecovirus, merbecovirus**  
46 **and embecovirus subgenera. Structural and functional studies delineate the molecular**  
47 **basis of S2P6 cross-reactivity and broad neutralization and indicate that this mAb blocks**  
48 **viral entry by inhibiting membrane fusion. S2P6 protects hamsters challenged with SARS-**  
49 **CoV-2 (including the B.1.351 variant of concern) through direct viral neutralization and Fc-**  
50 **mediated effector functions. Serological and B cell repertoire analyses indicate that**  
51 **antibodies targeting the stem helix are found in some convalescent donors and vaccinees**  
52 **but are predominantly of narrow specificity. Germline reversion of the identified cross-**  
53 **reactive mAbs revealed that their unmutated ancestors are specific for the endemic OC43**  
54 **or HKU1 viruses and acquired enhanced affinity and breadth through somatic mutations.**  
55 **These data demonstrate that conserved epitopes in the coronavirus fusion machinery can**  
56 **be targeted by protective antibodies and provide a framework for structure-guided design**  
57 **of pan- $\beta$ -coronavirus vaccines eliciting broad protection.**

58  
59

## 60 Introduction

61

62 Severe acute respiratory syndrome coronavirus 2 (SARS-CoV-2), which is the causative  
63 agent of the coronavirus disease 2019 (COVID-19), emerged at the end of 2019 and seeded the  
64 ongoing pandemic (1). Coronaviruses are zoonotic pathogens found in avian and mammalian  
65 reservoirs, including bats, palm civets, racoon dogs, pangolins and pigs to cite a few. Repeated  
66 spillovers to humans demonstrates that these viruses have broad capability to spread between  
67 multiple phylogenetically distinct species. Over the past two decades, in addition to SARS-CoV-  
68 2, severe acute respiratory syndrome coronavirus (SARS-CoV) and Middle-East respiratory  
69 syndrome coronavirus (MERS-CoV) crossed the species barrier to humans leading to epidemics.  
70 All three highly pathogenic coronaviruses belong to the  $\beta$ -coronavirus genus: SARS-CoV-2 and  
71 SARS-CoV cluster within lineage B (*sarbecovirus* subgenus) and likely originated in bats whereas  
72 MERS-CoV belongs to lineage C (*merbecovirus* subgenus) and is transmitted to humans via  
73 contact with dromedary camels. Furthermore, four endemic coronaviruses cause common colds  
74 in humans: the HCoV-HKU1 and HCoV-OC43  $\beta$ -coronaviruses in lineage A (*embecovirus*  
75 subgenus) and the more distantly related  $\alpha$ -coronaviruses NL63 and 229E (*setracovirus* and  
76 *duvinacovirus* subgenus).

77 The coronavirus spike (S) glycoprotein promotes viral entry into host cells through an S<sub>1</sub>  
78 subunit which engages host receptors and an S<sub>2</sub> subunit involved in membrane fusion (2). The  
79 S<sub>1</sub> subunit mediates receptor attachment, is the major target of (neutralizing) antibodies (Abs),  
80 and harbors the most sequence variability within the S glycoprotein (3–6). Accordingly, Abs  
81 binding to the receptor-binding domain (RBD) and N-terminal domain (NTD) within the S<sub>1</sub> subunit  
82 exert a selective pressure resulting in the emergence of new variants (6–10). The S<sub>2</sub> subunit is

83 more conserved than the S<sub>1</sub> subunit among coronaviruses putatively due to the necessity to  
84 maintain the functionality of the fusion machinery and due to low immune pressure. The extensive  
85 glycan shield on the S<sub>2</sub> subunit is also conserved among coronaviruses while retaining  
86 accessibility to functionally important regions, such as the fusion peptide (11). Abs binding to the  
87 S<sub>2</sub> fusion machinery could potentially neutralize distantly related coronaviruses as reported for  
88 human and mouse mAbs (12–14) and observed for other viruses, such as influenza and HIV-1  
89 (15, 16).

90 The emergence and rapid spread of SARS-CoV-2 has unequivocally demonstrated the  
91 need to develop interventions against coronaviruses, for this pandemic as well as for future  
92 spillover events. In the long term, the most effective drugs will be those with efficacy against a  
93 broad spectrum of coronaviruses, such as broadly neutralizing mAbs which target highly  
94 conserved S epitopes that are less likely to mutate and develop resistance. Furthermore,  
95 identifying conserved epitopes may guide the design of next generation pan β-coronavirus  
96 vaccines that could protect against both current and future emerging SARS-CoV-2 variants and  
97 other β-coronaviruses.

98 Here we describe the isolation of five mAbs that cross-react and broadly neutralize  
99 multiple human and animal β-coronaviruses by targeting the S glycoprotein stem helix. Structural  
100 and functional analyses of one of these mAbs (S2P6) indicate that inhibition of viral entry involves  
101 blocking membrane fusion which is the basis for broad β-coronavirus neutralization. S2P6  
102 activates immune cell-dependent effector functions in vitro and protects hamsters challenged with  
103 SARS-CoV-2 Wuhan-1 and B.1.351 isolates leveraging both neutralization and effector functions.  
104 These findings pave the way for the development of pan β-coronavirus vaccines and therapeutics.

105

106

## 107 Results

108

### 109 Isolation of a broadly-neutralizing β-coronavirus mAb from a convalescent SARS-CoV-2 110 exposed individual

111 To identify mAbs targeting highly conserved regions of the S glycoprotein, we interrogated  
112 human IgG<sup>+</sup> memory B cells from three COVID-19 convalescent donors. Five mAbs bound to the  
113 prefusion-stabilized S ectodomain trimers of viruses belonging to all three human-infecting β-  
114 coronavirus subgenera, i.e., *sarbecovirus* (SARS-CoV and SARS-CoV-2), *merbecovirus* (MERS-  
115 CoV) and *embecovirus* (OC43 and HKU1), but not to the human α-coronaviruses (229E and  
116 NL63) (**Fig. 1A-C** and **fig. S1A-B**). S2P6 and S2S43 mAbs were derived from two donors and  
117 use VH1-46\*01 and D5-12\*01 genes whereas the other 3 mAbs (P34D10, P34G12 and P34E3),  
118 derived from a third donor, are clonally related and use the VH3-30 gene (**fig. S1A**). Overall, the  
119 level of somatic mutations in these 5 mAbs in variable regions was moderate with nucleotide  
120 sequence identities to germline genes ranging from 86 to 97% (**fig. S1A**). The mAbs bound to  
121 both prefusion and post-fusion SARS-CoV-2 S with comparable apparent avidities, indicating that  
122 their cognate epitope is (at least partially) accessible in both conformational states of the S  
123 glycoprotein (**Fig. 1A** and **fig. S1B-C**).

124 S2P6 was selected for further in-depth characterization and shown to bind to all full-length  
125 SARS-CoV-2 S variants tested and to 25 S glycoproteins (transiently expressed on the surface  
126 of ExpiCHO cells) representative of all *sarbecovirus* clades (**Fig. 1D** and **fig. S1D-E**). Using

127 surface plasmon resonance (SPR), we found that S2P6 Fab fragment had the highest affinity for  
128 SARS-CoV-2 S and SARS-CoV S followed by MERS-CoV S and OC43 S with equilibrium  
129 dissociation constants ( $K_D$ ) of 7, 7, 12 and 16 nM, respectively (**fig. S1F-G**). S2P6 also bound to  
130 HKU1 S albeit with reduced affinity ( $K_D \sim 120$  nM) (**fig. S1F**). The recognition of prefusion SARS-  
131 CoV-2 S by this mAb is pH dependent with higher binding affinity at pH 7, relative to pH 5, in both  
132 IgG and Fab formats (**fig. S1G**). Together, these data demonstrate the remarkable and efficient  
133 cross-reactivity of S2P6 towards all human-infecting  $\beta$ -coronaviruses.

134 To evaluate the neutralization potency and breadth of S2P6, we investigated its ability to  
135 inhibit entry of authentic SARS-CoV-2 into Vero-E6 cells in the presence or absence of the S-  
136 activating protease TMPRSS2. S2P6 completely neutralized infection of TMPRSS2-positive  
137 Vero-E6 cells but was less effective in neutralizing infection of Vero-E6 cells (**Fig. 1E**). Previous  
138 studies established that the main route of SARS-CoV-2 entry into cultured lung cells occurs  
139 through TMPRSS2-activated fusion with the cytoplasmic membrane (17–19). The more efficient  
140 S2P6-mediated neutralization of SARS-CoV-2 entry into Vero-E6 cells expressing TMPRSS2,  
141 relative to cells lacking this protease, would be consistent with reduced S2P6 binding at  
142 endosomal pH (**fig. S1G**) and suggests that S2P6 is maximally efficient towards the viral entry  
143 pathway associated with lung cell infection. We subsequently assessed S2P6-mediated  
144 neutralization of vesicular stomatitis virus (VSV) (20) pseudotyped with SARS-CoV-2 S of several  
145 variants of concern (VOC), including B.1.1.7, B.1.351 and P.1, and observed similar potency to  
146 that found against the parental SARS-CoV-2 D614G S (**Fig. 1F**). Moreover, S2P6 inhibited SARS-  
147 CoV S, Pangolin Guangdong 2019 (PANG-GD) S, MERS-CoV S and OC43 S VSV pseudotypes  
148 with IC50 values ranging from 0.02 to 17  $\mu\text{g/ml}$  (**Fig. 1G**). S2P6 therefore features an  
149 unprecedented broad  $\beta$ -coronavirus neutralizing activity, including SARS-CoV-2 and SARS-CoV  
150 sarbecovirus clades as well as members of the merbecovirus and embecovirus subgenera.

151 To define the epitopes recognized by the identified mAbs, we performed peptide mapping  
152 experiments using 15-mer linear overlapping peptides (**fig. S2A**). All five mAbs bound to peptides  
153 containing the SARS-CoV-2 motif F<sub>1148</sub>KEELDKYF<sub>1156</sub> (**Fig. 1H**) located in the stem helix within  
154 the S<sub>2</sub> subunit. This region is strictly conserved in SARS-CoV, highly conserved among other  $\beta$ -  
155 coronaviruses, and overlaps with the epitopes of B6 (**Fig. 1I**) and 28D9, two mAbs which were  
156 previously identified following mouse immunization (12, 13). S2P6 bound efficiently to the stem  
157 helix peptides of the five  $\beta$ -coronaviruses that infect humans (albeit with a faster off-rate for HKU1)  
158 as well as of the MERS-CoV-related bat viruses (HKU4 and HKU5) and murine hepatitis virus  
159 (MHV) (**Fig. 1J** and **fig. S2B**). S2S43 exhibited similar overall binding to S2P6 with markedly  
160 weaker reactivity towards the HKU1, HKU4 and HKU5 peptides, whereas the three clonally  
161 related P34D10, P34G12, and P34E3 mAbs exhibited weaker or no binding to HKU4 and HKU5  
162 peptides (**fig. S2B**).

163  
164

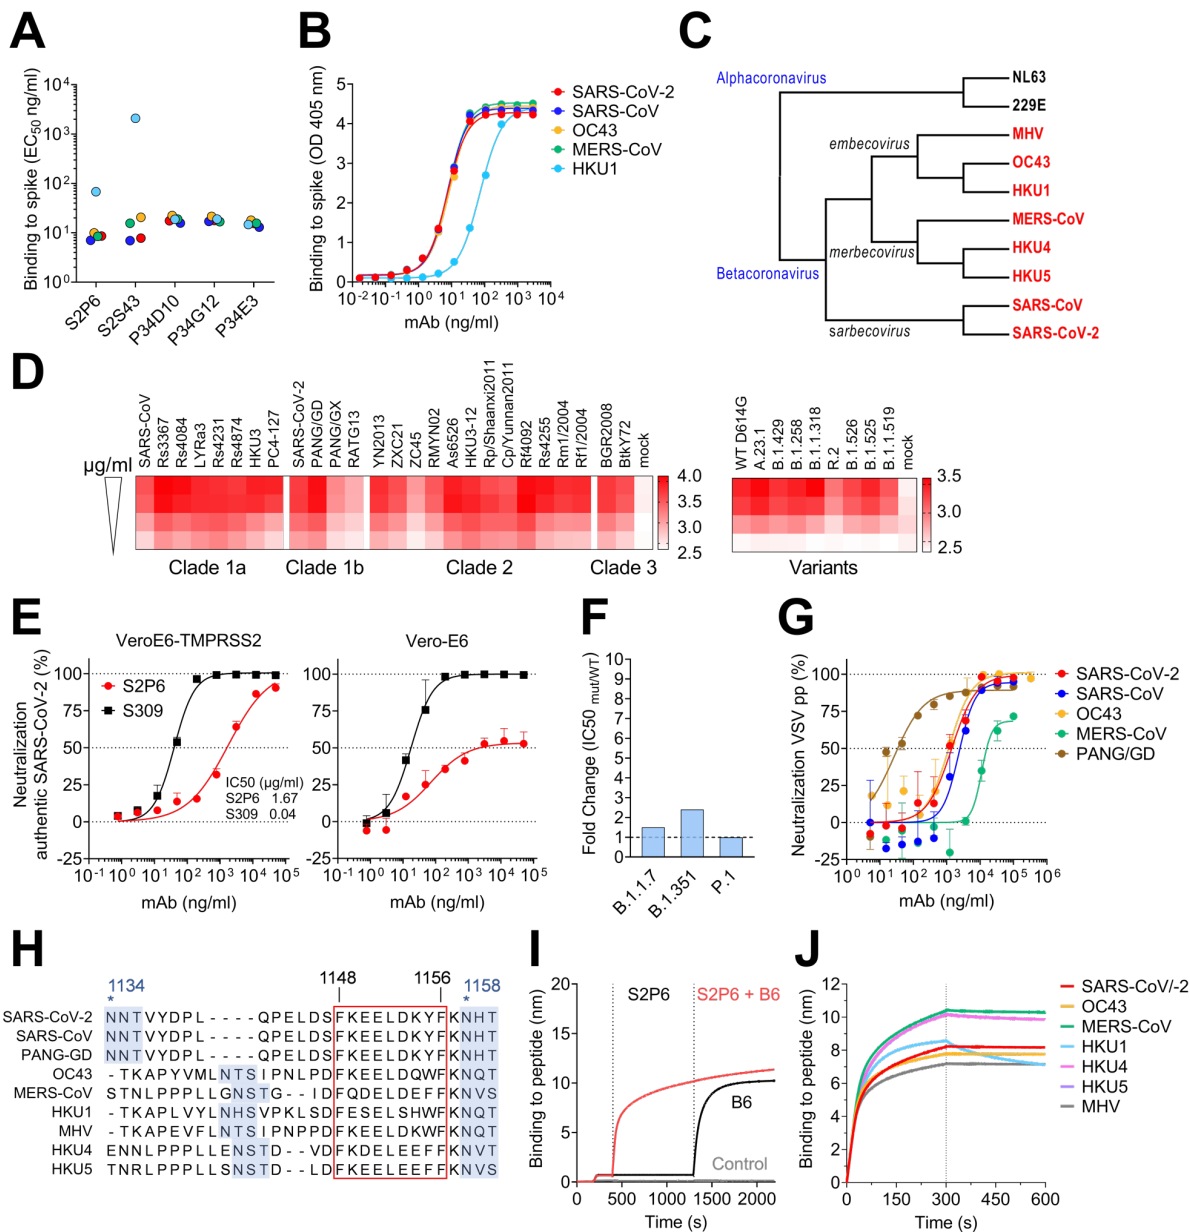

165  
166

167 **Fig. 1. The S2P6 cross-reactive mAb broadly neutralizes β-coronaviruses from three**  
 168 **subgenera. (A-B)** Binding avidity (EC<sub>50</sub>) of 5 mAbs to prefusion coronavirus S trimer  
 169 ectodomains as determined by ELISA (A). S2P6 binding curves from one representative  
 170 experiment out of two is shown (B). (C) Cladogram of representative α- and β-coronavirus S  
 171 glycoprotein amino acid sequences inferred via maximum likelihood analysis. β-coronaviruses  
 172 are highlighted in red. (D) Flow cytometry analysis of S2P6 binding (from 10 to 0.22 μg/ml) to a  
 173 panel of 26 S glycoproteins representative of all *sarbecovirus* clades (left) and 8 SARS-CoV-2

174 variants (right) displayed as a heat map of log MFI (mean fluorescent intensity). (E) Neutralization  
175 of authentic SARS-CoV-2 by S2P6 determined using VeroE6-TMPRSS2 (left) or Vero-E6 (right)  
176 cells. S309 mAb that binds RBD site IV (21) is included for comparison. Mean  $\pm$  s.d. of triplicates  
177 from one representative experiment out of three is shown. (F) S2P6-mediated neutralization of  
178 SARS-CoV-2 B.1.1.7 S, B.1.351 S and P.1 S VSV pseudotypes represented as IC<sub>50</sub> fold change  
179 relative to wildtype (D614G) S VSV pseudotype. (G) S2P6-mediated neutralization of VSV  
180 pseudotyped with various  $\beta$ -coronavirus S glycoproteins. Error bars indicate standard deviation  
181 of triplicates. IC<sub>50</sub> values: 2.4  $\mu$ g/ml, 1.4  $\mu$ g/ml, 17.1  $\mu$ g/ml, 1.3  $\mu$ g/ml and 0.02  $\mu$ g/ml for SARS-  
182 CoV, SARS-CoV-2, MERS-CoV, OC43 and PANG/GD, respectively. (H) Alignment of  $\beta$ -  
183 coronavirus stem helix region with the S2P6 epitope boxed. Residue numbering is shown  
184 according to SARS-CoV-2 S. N-linked glycosylation sequons are highlighted in blue. (I)  
185 Competition assay of S2P6/B6 binding to the identical stem helix peptide from SARS-CoV-2 and  
186 SARS-CoV (herein defined as SARS-CoV/-2). B6 binding in presence of S2P6 (red line), B6  
187 binding in absence of S2P6 (black line) and the no SARS-CoV/-2 stem peptide control (grey line)  
188 is shown. (J) Kinetics of S2P6 binding to a panel of biotinylated  $\beta$ -coronavirus stem helix peptides  
189 immobilized at the surface of biolayer interferometry biosensors.

190

### 191 **Structural basis for S2P6 binding to the conserved S glycoprotein stem helix**

192 To unveil the molecular basis of the exceptional S2P6 neutralization breadth, we  
193 determined a cryo-EM structure of the SARS-CoV-2 S ectodomain trimer in complex with the Fab  
194 fragments of S2P6 and S2M11 (to lock the RBDs in the closed state (22)) at 4.1 Å overall  
195 resolution. The marked conformational dynamics of the region recognized by S2P6 limited the  
196 local resolution of the stem helix/Fab to approximately  $\sim$ 12 Å (**Fig. 2A**, **table S1** and **fig S3**). 3D  
197 classification of the cryo-EM data revealed incomplete Fab saturation (**fig. S3**). Our cryo-EM  
198 structure confirms that S2P6 recognizes the stem helix and suggests that the mAb disrupts its  
199 quaternary structure, which is presumed to form a 3-helix bundle in prefusion SARS-CoV-2 S (3,  
200 4, 12). To overcome the limited resolution of the stem helix/Fab interface in the cryoEM structure,  
201 we determined a crystal structure of the S2P6 Fab in complex with the SARS-CoV-2 S stem helix  
202 peptide (residues 1146-1159) at 2.67 Å resolution (**Fig. 2B-D**, **fig. S4A** and **table S2**). The peptide  
203 folds as an amphipathic  $\alpha$ -helix resolved for residues 1146 to 1159. S2P6 buries approximately  
204 600 Å<sup>2</sup> upon binding to its epitope using shape-complementarity and hydrogen bonding involving  
205 complementarity determining regions (CDR) H1-H3, L1 and L3. The light chain residues Y33,  
206 Y92, G93, P96, P97 and F99 as well as heavy chain residues Y33, I50, H57, T58, S59, P101,  
207 K102 and G103 form a deep groove in which the hydrophobic side of the stem helix docks via  
208 residues F1148, L1152, Y1155 and F1156. Binding specificity is provided through backbone  
209 hydrogen bonding of residues F1148<sub>SARS-CoV-2</sub> and K1149<sub>SARS-CoV-2</sub> with CDRH3 P101, side chain  
210 hydrogen bonding of residues E1151<sub>SARS-CoV-2</sub> with CDRL1 Y33 and CDRL3 S94, D1153<sub>SARS-CoV-2</sub>  
211 with CDRH1 Y33 side chains as well as Y1155<sub>SARS-CoV-2</sub> S with CDRH2 S59 through a water  
212 molecule (**Fig. 2C-D**). The contribution of each epitope residue was validated by single  
213 substitution scan analysis with most mutations at positions 1148, 1151-1153 and 1155-1156  
214 abolishing S2P6 binding, highlighting the importance of these residues for binding (**fig. S5A**). A  
215 substitution scan analysis performed on the P34D10, P34G12 and P34E3 mAbs revealed a  
216 similar pattern of key interacting residues (**fig. S5A**). Residue Y1155 is conservatively substituted  
217 to F1238<sub>MERS-CoV</sub> or W1237/1240<sub>HKU1/OC43</sub> and residue D1153 is conserved in MERS-CoV and

218 OC43 but mutated to S1235 for HKU1 (**fig. S5B**). The residue scan and structural results suggest  
219 that the reduced binding affinity of S2P6 for HKU1 S is (at least partially) due to the D1153<sub>SARS-</sub>  
220 <sub>CoV-2</sub>S1235<sub>HKU1</sub> substitution which is expected to abrogate or dampen electrostatic interactions  
221 with the CDRH1 Y33 side chain hydroxyl (**Fig. 2C-D**).

222 Although S2P6 and B6 recognize a similar epitope (**fig. S4B-C**), they bind with opposite  
223 orientations of the heavy and light chains relative to the stem helix and the S2P6-bound structure  
224 resolves 3 additional C-terminal peptide residues (1156-1159) compared to the B6-bound  
225 structure (1147-1156) (**fig. S4B-C**). Superposition of both structures based on the stem helix  
226 reveals that B6 CDRH2 would sterically clash with H1159<sub>SARS-CoV-2</sub>, putatively explaining the  
227 broader cross-reactivity of S2P6 over B6 (**fig. S4B-C**).

228 To further validate our structural data, we carried out viral escape mutant selection in vitro  
229 in the presence of S2P6 using a replication-competent VSV-SARS-CoV-2 S chimeric virus (23).  
230 After two passages, virus neutralization by S2P6 was abrogated and deep sequencing revealed  
231 the emergence of five distinct resistance mutations: L1152F, D1153N/G/A and F1156L, which are  
232 consistent with the structural data and substitution scan analysis (**fig. S5A**). These mutations  
233 have been detected with very low frequency in circulating SARS-CoV-2 isolates (146 out of  
234 1,217,814 sequences as of April 30, 2021). The isolation of escape mutants in a VSV-SARS-CoV-  
235 2 S chimeric virus system contrasts with the high conservation of the stem helix and suggest that  
236 a selection pressure not recapitulated here could limit accumulation of mutations in this epitope  
237 in the authentic virus.

238

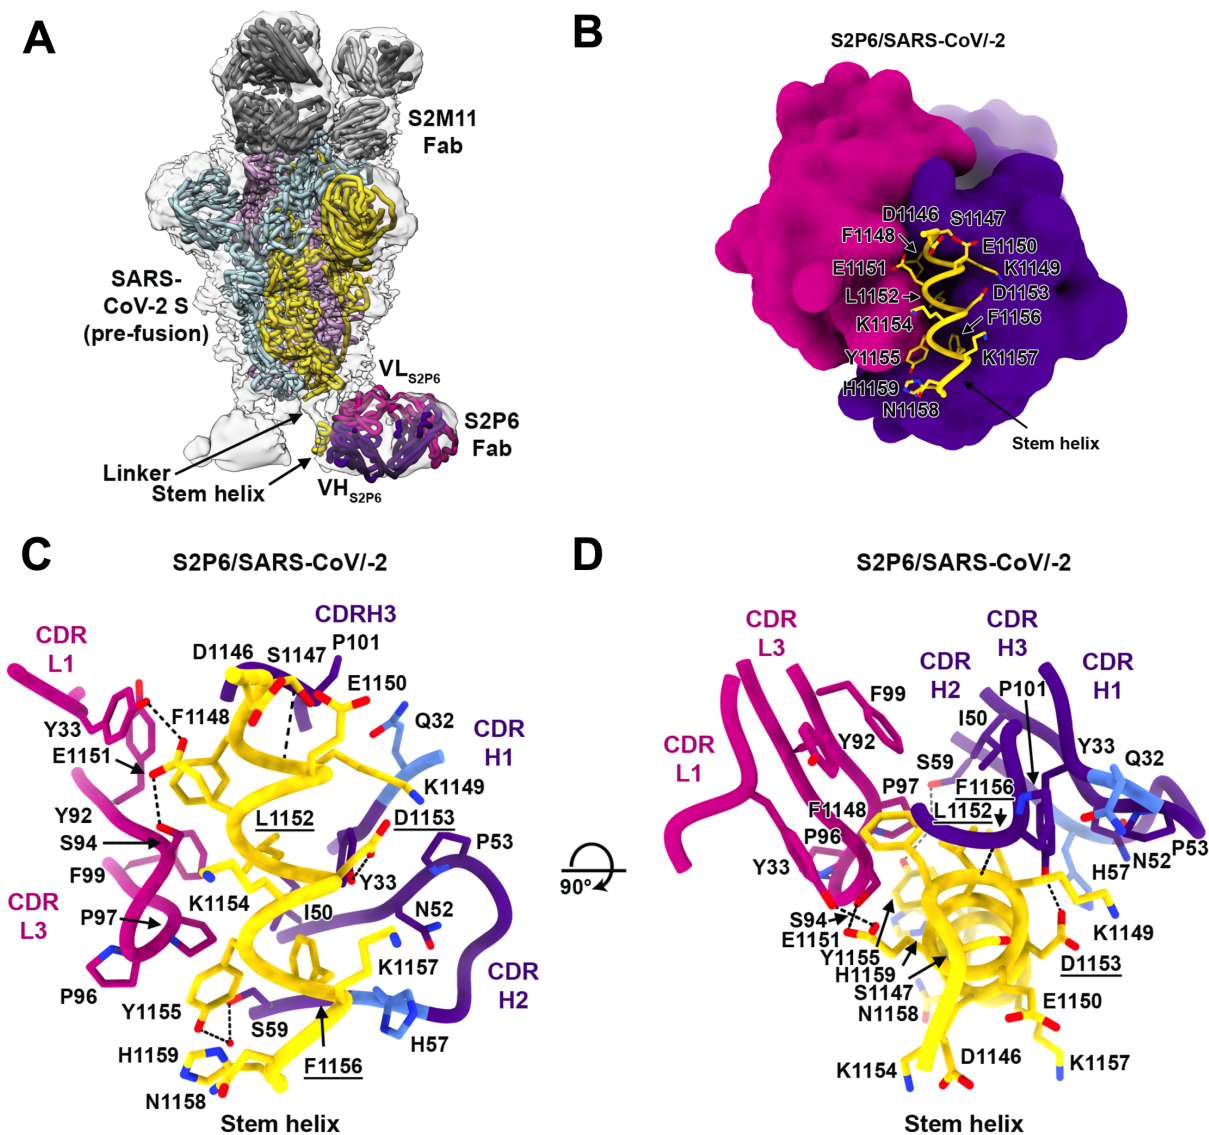

239  
240

241 **Fig. 2: Structural basis for the broad S2P6 cross-reactivity with a conserved coronavirus**  
 242 **stem helix peptide.** (A) Composite model of the S2P6-bound SARS-CoV-2 S cryoEM structure  
 243 and of the S2P6-bound stem helix peptide crystal structure docked in the cryoEM map  
 244 (transparent gray surface). SARS-CoV-2 S protomers are colored pink, cyan and gold, the S2P6  
 245 Fab heavy and light chains are colored purple and magenta and the S2M11 Fab heavy and light  
 246 chains are colored dark and light gray, respectively. (B) Ribbon diagram of the S2P6 Fab (surface  
 247 rendering) in complex with the SARS-CoV-2 S stem helix peptide (yellow ribbon with side chains  
 248 rendered as sticks and labeled). (C-D) Ribbon diagram in two orthogonal orientations of the S2P6  
 249 Fab bound to the SARS-CoV-2 S stem helix peptide showing a conserved network of interactions.  
 250 Only key interface residues and the S2P6 CDR loops are shown for clarity. Residues Q32 and  
 251 H57, that are mutated during affinity maturation of the S2P6 heavy chain, are colored blue.  
 252 Hydrogen bonds are indicated with dashed lines. Residues substituted in the escape mutants  
 253 isolated are underlined.



254  
255  
256  
257  
258  
259  
260  
261  
262  
263  
264  
265  
266  
267  
268  
269  
270  
271  
272  
273  
274  
275  
276  
277  
  
278  
279  
280  
281  
282  
283  
284  
285  
286  
287  
288  
289

### **Stem helix-targeting mAbs inhibit S-mediated membrane fusion**

The S stem helix forms a 3-helix bundle in many prefusion cryoEM structures of SARS-CoV-2 S and SARS-CoV S (3, 4, 11, 24–26). In contrast, the S2P6/S2M11/SARS-CoV-2 S cryoEM structure suggests that the quaternary organization of the stem is disrupted (**Fig. 2A**) as supported by the observation that S2P6 binds to the hydrophobic face of the stem helix which is expected to be mostly buried through homo-oligomeric interactions in prefusion S, and that may be only transiently available for Ab binding. Although we observed S2P6 binding to post-fusion SARS-CoV-2 S (**fig. S1C**), the epitope recognized is buried at the interface with the other two protomers of the rod-shaped trimer and is therefore not expected to be fully accessible (**fig. S4D**) (12, 27–29). Based on these data, we hypothesized that S2P6 binding to S sterically interferes with the conformational changes leading to membrane fusion, as observed for B6 (12) and 27D9 (13).

To validate the inferred mechanism of S2P6-mediated broad coronavirus neutralization, we first showed that S2P6 binding did not block engagement of SARS-CoV-2 S by ACE2 using ELISA, as expected based on the remote location of its epitope from the RBD (**Fig. 3A**). S2P6, however, blocked cell-cell fusion between Vero-E6 cells transfected with full-length SARS-CoV-2 S as effectively as the S2M11 mAb which locks SARS-CoV-2 S in the closed state (22) (**Fig. 3B**). We previously described mAbs targeting RBD antigenic site Ia (e.g. S2E12) and IIa (e.g. S2X259 or S2X35) which can mimic receptor attachment and prematurely trigger fusogenic S conformational changes (11, 30, 31). Accordingly, S2P6 at concentrations as low as 1 ng/ml abrogated the formation of syncytia mediated by S2E12 (30). Collectively, these results suggest that the main mechanism of S2P6 neutralization is to prevent viral entry via inhibition of membrane fusion resulting from impeding S fusogenic rearrangements (**Fig. 3C**).

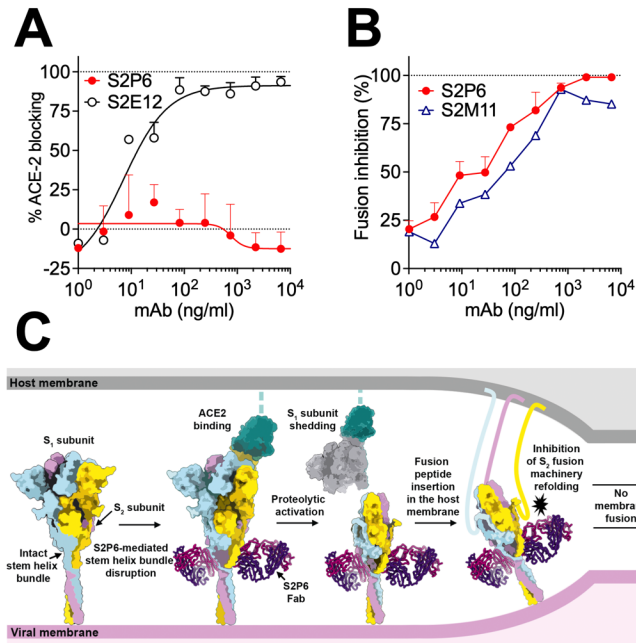

290  
291  
292  
293  
294  
295  
296  
297  
298  
299  
300  
301  
302

**Fig. 3. S2P6 binding disrupts the stem helix bundle and sterically inhibits membrane fusion.** (A) SARS-CoV-2 S binding to ACE2 in the presence of mAb S2P6 analyzed by ELISA. S2E12 was included as a positive control. (B) S2P6 inhibition of cell-cell fusion using Vero-E6 cells transfected with SARS-CoV-2 S. S2M11 was included as a positive control. Inhibition of fusion values are normalized to the percentage of fusion without mAb (100%) and to that of fusion of non-transfected cells (0%). (C) Proposed mechanism of inhibition mediated by the S2P6 mAb. S2P6 binds to the hydrophobic core of the stem helix bundle and disrupts its quaternary structure. S2P6 binding likely prevents S<sub>2</sub> subunit refolding from the pre- to the post-fusion state and blocks viral entry.

303 **S2P6-mediated protection is enhanced by Fc-mediated effector functions in hamsters**

304 Fc-mediated effector functions can contribute to in vivo protection by promoting viral  
305 clearance and anti-viral immune responses (32–35). We analyzed the ability of S2P6 to trigger  
306 activation of Fc $\gamma$ RIIa and Fc $\gamma$ RIIIa, as well as to exert Fc effector functions in vitro. S2P6 promoted  
307 moderate dose-dependent Fc $\gamma$ RIIa and Fc $\gamma$ RIIIa mediated signaling using a luciferase reporter  
308 assay (**Fig. 4A**). S2P6 promoted robust activation of Ab-dependent cell cytotoxicity (ADCC), to  
309 levels comparable to those observed with the S309 mAb (21), following incubation of SARS-CoV-  
310 2 S expressing CHO-K1 target cells with human peripheral blood mononuclear cells (PBMCs)  
311 (**Fig. 4B**). S2P6 also triggered Ab-dependent cellular phagocytosis (ADCP) activity using Cell-  
312 Trace-Violet-labelled PBMCs as phagocytic cells, and SARS-CoV-2 S expressing CHO (CHO-S)  
313 as target cells (**Fig. 4C**). Finally, S2P6 did not promote complement-dependent cytotoxicity (CDC)  
314 (**Fig. 4D**) indicating that S2P6 Fc-mediated effector functions, but not complement activation,  
315 might participate in viral control in vivo.

316 We next evaluated the prophylactic activity of S2P6 against challenge with the prototypic  
317 (Wuhan-1 related) SARS-CoV-2 in a Syrian hamster model (36). As we previously showed that  
318 human IgG1s poorly recognize Fc $\gamma$ Rs (30), we compared S2P6 harboring a human IgG1 (Hu-  
319 S2P6) or a hamster IgG2a constant region (Hm-S2P6), the latter enabling optimal interactions  
320 with hamster Fc $\gamma$ Rs. Two different doses of Hu-S2P6 or Hm-S2P6 were administered 24 hours  
321 prior to intranasal SARS-CoV-2 challenge and the lungs of the animals were assessed 4 days  
322 post-infection for viral RNA load and replicating virus. Hm-S2P6 administered at 20 mg/kg  
323 reduced viral RNA copies and replicating viral titers in the lungs of animals by two orders of  
324 magnitude relative to a control mAb (**Fig. 4E**). Moreover, Hm-S2P6 at 20 mg/kg reduced viral  
325 RNA copies detected in the lungs to levels significantly lower than those observed with Hu-S2P6,  
326 suggesting a beneficial effect of S2P6 effector functions in vivo. Based on the comparable S2P6  
327 neutralization potencies towards SARS-CoV-2 VOC observed in vitro (**Fig. 1F**), we set out to  
328 assess the protective efficacy of S2P6 in hamsters challenged with SARS-CoV-2 B.1.351.  
329 Prophylactic administration of Hu-S2P6 at 20 mg/kg reduced replicating viral titers in the lungs  
330 (but not RNA copy numbers) by ~1.5 order of magnitude relative to the control group, in line with  
331 the strict conservation of the stem helix epitope in all VOC identified to date (**Fig 4F**).

332 Collectively, these findings demonstrate that Abs targeting a highly conserved epitope in  
333 the S fusion machinery can trigger Fc-mediated ADCC and ADCP in vitro and protect against  
334 SARS-CoV-2 challenge by leveraging both neutralization and effector functions in vivo.

335  
336

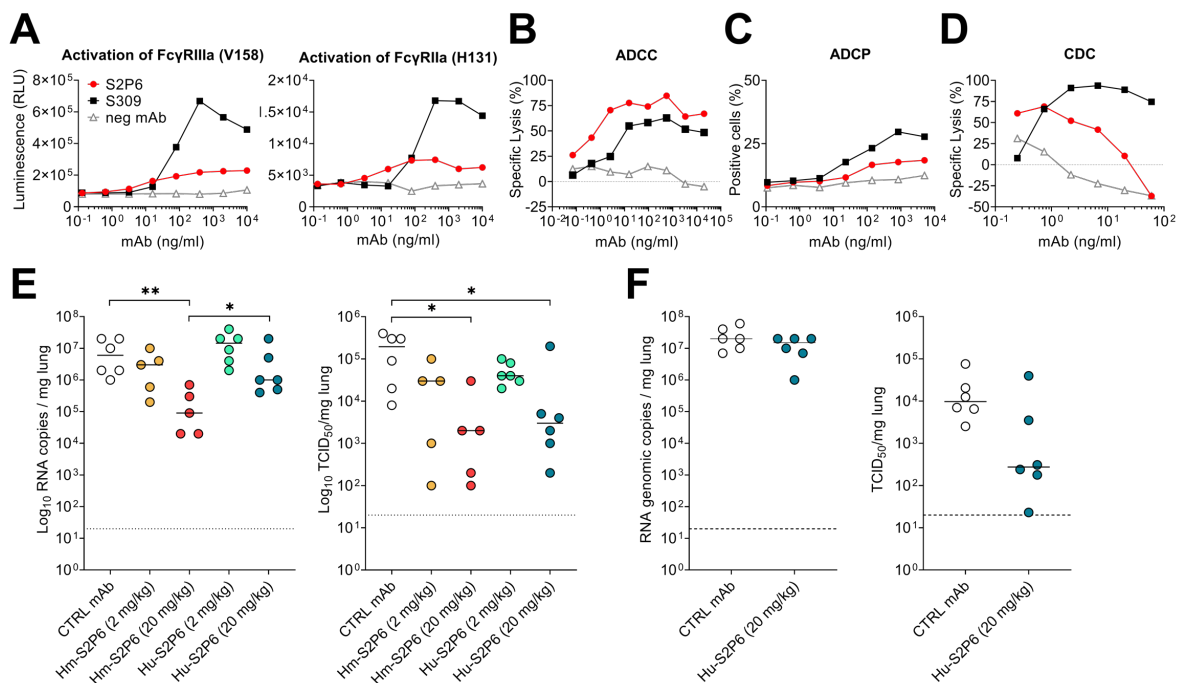

337  
338

339 **Fig. 4. S2P6 activates effector functions and protects Syrian hamsters from SARS-CoV-2**  
 340 **challenge.** (A) NFAT-driven luciferase signal induced in Jurkat cells stably expressing FcγRIIIa  
 341 (V158, left) or FcγRIIa (V131, right) upon S2P6 binding to full-length wild-type SARS-CoV-2 S  
 342 expressed at the surface of CHO target cells. S309 is included as positive control. RLU, relative  
 343 luminescence unit. (B) mAb-mediated ADCC using SARS-CoV-2 CHO-K1 cells (genetically  
 344 engineered to stably express a HaloTag-HiBit-tagged) as target cells and PBMC as effector cells.  
 345 The magnitude of NK cell-mediated killing is expressed as percentage of specific lysis. (C) mAb-  
 346 mediated ADCP using Cell-Trace-Violet-labelled PBMCs as a source of phagocytic cells  
 347 (monocytes) and PKH67-fluorescently labeled S-expressing CHO cells as target cells. The y-axis  
 348 indicates percentage of monocytes double-positive for anti-CD14 (monocyte) marker and PKH67.  
 349 (D) Lysis of SARS-CoV-2 S stably transfected CHO cells by mAbs in the presence of complement  
 350 (CDC assay). (E) Syrian hamsters were administered with the indicated amount of S2P6 mAb  
 351 harboring either a hamster (Hm-S2P6) or a human (Hu-S2P6) constant region before intranasal  
 352 challenge with prototypic SARS-CoV-2 (Wuhan-1 related). An irrelevant mAb (MGH2 against CSP  
 353 of *P. falciparum*) at 20 mg/kg was used as negative control (37). Shown are viral RNA loads (left)  
 354 and replicating virus titers (right). (F) Prophylactic administration of 20 mg/kg of human S2P6 in  
 355 hamsters challenged with SARS-CoV-2 B.1.351 VOC. Shown are viral RNA loads (left) and  
 356 replicating virus titers (right). \* P<0.05, \*\* P<0.01 Mann-Whitney test.

357  
358  
359  
360

361 **Natural infection or vaccination predominantly elicit stem helix-directed Abs of narrow**  
362 **specificities**

363 To understand how frequently stem helix-specific Abs are elicited, we performed  
364 serological analysis using plasma samples from pre-pandemic, COVID-19 convalescent, and  
365 COVID-19 vaccinated individuals (**Fig. 5A** and **fig. S6**). We determined the titers of plasma IgG  
366 binding to stem helix peptides of SARS-CoV-2/SARS-CoV (SARS-CoV/-2), OC43, MERS-CoV,  
367 HKU1, HKU4 and HKU5. We did not observe plasma Abs binding to stem helix peptides in pre-  
368 pandemic samples, except for HKU1, probably reflecting prior infection with this virus in this  
369 cohort. Conversely, stem helix-specific Abs were found at low frequency in individuals previously  
370 infected with SARS-CoV-2 or receiving two doses of mRNA vaccines (**Fig. 5A**). Overall, these  
371 data show that plasma Ab responses to the stem helix are elicited upon SARS-CoV-2 infection or  
372 vaccination although they are relatively rare.

373 Next, we investigated the frequency of stem helix specific Abs in the memory B cell  
374 repertoire of 21 convalescent and 17 vaccinated individuals using a clonal analysis based on in  
375 vitro polyclonal stimulation (38), here referred as antigen-specific B-cell memory repertoire  
376 analysis (AMBRA) (**Fig. 5B-G** and **fig. S6-S8**). In both cohorts, we observed frequencies of stem  
377 helix specific IgGs ranging from 0.1-2.5%, except for one individual (infected and vaccinated with  
378 a single dose of mRNA vaccine) for whom we measured an exceptionally high frequency of  
379 SARS-CoV/-2 stem helix-specific Abs (**fig. S8**). Most SARS-CoV-2 stem helix specific Abs were  
380 found to be cross-reactive with OC43, consistent with the high sequence identity of the stem  
381 helices of these two viruses (**Fig. 1H**). Abs specific for the HKU1 S stem helix were found in some  
382 individuals but they were not cross-reactive with other  $\beta$ -coronaviruses (**Fig. 5D** and **G**). This  
383 analysis revealed a single example of cross-reactivity to all stem helix  $\beta$ -coronavirus peptides  
384 tested (**Fig. 5E**), whereas most others Abs show a more limited cross-reactivity among  $\beta$ -  
385 coronaviruses.

386

387 **Broadly reactive  $\beta$ -coronavirus Abs acquire affinity and breadth through somatic**  
388 **mutations**

389 To define the ontogeny of the broadly reactive  $\beta$ -coronavirus mAbs described here, we  
390 generated a panel of germline variants of S2P6, P34D10, P34E3 and P34G12 mAbs. Two out of  
391 seven S2P6 heavy chain residues that are mutated relative to germline contribute to epitope  
392 recognition (Q32 and H57) whereas none of the 5 light chain mutated residues participate in S  
393 binding (**Fig. 2C-D**). To address the role of VH and VK somatic mutations we therefore generated  
394 a panel of S2P6 germline variants for the heavy or the light chain, or both variable regions (VH  
395 and VK). The fully germline S2P6 (UCA) bound to OC43 and MERS-CoV stem helix peptides  
396 (with approximately 1 order of magnitude higher EC50 compared to the mutated mAb) but not to  
397 SARS-CoV/-2 or HKU1 peptides (**Fig. 5H**). Somatic mutations in VH were sufficient for high avidity  
398 binding to SARS-CoV/-2, whereas both VH and VK mutations were required for optimal binding  
399 to HKU1. The presence of residue G103 in CDRH3 was found to be essential for binding to all  $\beta$ -  
400 coronaviruses (**fig. S9A**). Collectively, these findings indicate that the S2P6 mAb likely arose in  
401 response to OC43 infection, and its specificity was broadened towards SARS-CoV-2 and HKU1  
402 through somatic mutations selected upon natural infection with one or both of these  $\beta$ -  
403 coronaviruses. In contrast, analysis of UCA binding of the clonally related P34D10, P34G12 and  
404 P34E3 mAbs suggest they were likely primed by HKU1 infection, rather than OC43, and acquired

405 breadth towards the other human  $\beta$ -coronaviruses primarily through somatic mutations in VH (**Fig.**  
406 **5I** and **fig. S9B**). Together with the serological and B cell repertoire analysis, these findings  
407 demonstrate that broadly reactive  $\beta$ -coronavirus Abs may result from priming of virus-specific B  
408 cells gaining affinity and breadth through somatic mutations in response to heterotypic  
409 coronavirus exposures.  
410

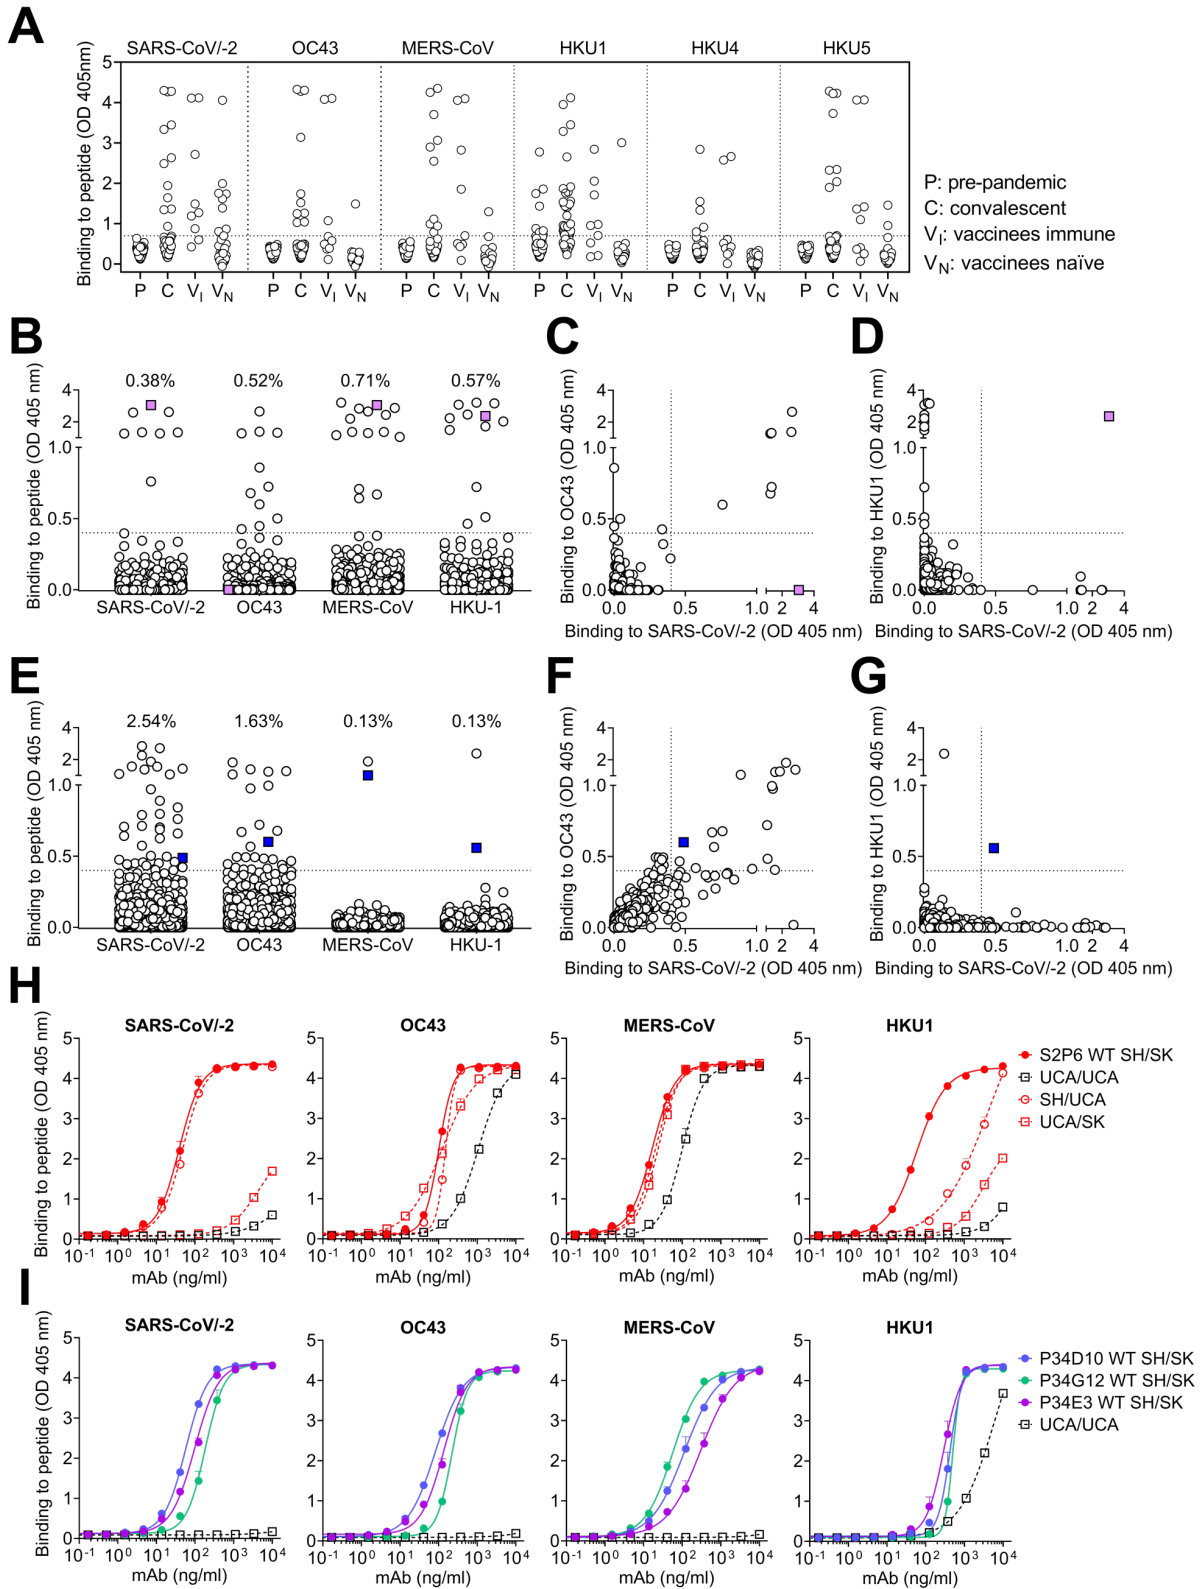

411

412

413 **Fig. 5: Stem helix-directed Abs are of narrow specificities and acquire affinity and breadth**  
414 **through somatic mutations. (A)** Binding of pre-pandemic (P, n=88), COVID-19 convalescent  
415 (C, n=72), vaccinees immune (VI, n=9) and vaccinees naïve (VN, n=37) plasma Abs diluted 1:10  
416 to  $\beta$ -coronavirus stem helix peptides analyzed by ELISA. A cut-off of 0.7 was determined based  
417 on signal of pre-pandemic samples and binding to uncoated ELISA plates. **(B-G)** Analysis of  
418 memory B-cell binding to  $\beta$ -coronavirus stem helix peptides from 21 COVID-19 convalescent  
419 individuals (B-D) and 16 vaccinees (E-G). Each dot representing individual culture containing  
420 oligo-clonal B cells screened against stem helix peptides in ELISA. Pairwise reactivity comparison  
421 is shown for SARS-CoV-2 and OC43 (C and F) and SARS-CoV-2 and HKU1 (D and G).  
422 Highlighted in color are cultures cross-reactive with at least three peptides. **(H-I)** Binding of S2P6  
423 (H) (mutated SH/SK), fully germline reverted (UCA/UCA), germline reverted heavy chain paired  
424 with mature light chain (UCA/SK), mature heavy chain paired with germline reverted light chain  
425 (SH/UCA) and of P34D10, P34G12 and P34E3 (I) (WT SH/SK), and germline reverted  
426 (UCA/UCA) to stem helix peptides.

427

## 428 Discussion

429 The coronavirus S<sub>2</sub> subunit (fusion machinery) contains several important antigenic sites,  
430 including the fusion peptide and the heptad-repeat 2 regions, and is more conserved than the S<sub>1</sub>  
431 subunit (39–43). As a result, it is an attractive target for broad coronavirus detection and  
432 neutralization (44). The recent identification of 4 cross-reactive mAbs targeting the stem helix  
433 unveiled this previously unknown S<sub>2</sub> subunit epitope, which is conserved among  $\beta$ -coronavirus S  
434 glycoproteins (12–14, 45), although none of them inhibit members of all three  $\beta$ -coronavirus  
435 subgenera (lineages). Here, we identified five mAbs targeting overlapping epitopes in the S stem  
436 helix and cross-reacting with human and animal  $\beta$ -coronaviruses. We showed that S2P6 broadly  
437 neutralizes all sarbecoviruses, merbecoviruses and embecoviruses evaluated through inhibition  
438 of membrane fusion. The exceptionally broad cross-reactivity and neutralization breadth of S2P6  
439 is explained by the conserved nature of the stem helix among  $\beta$ -coronaviruses. Fewer than  
440 ~0.06% SARS-CoV-2 sequences have been reported to be mutated between S residues 1146  
441 and 1159 out of more than 1.3 million genomes deposited in GISAID as of April 2021 and no  
442 SARS-CoV-2 VOC harbor residue substitutions within this region.

443 We also provide evidence that a S<sub>2</sub> subunit-directed mAb protects hamsters from SARS-  
444 CoV-2 challenge, including with the SARS-CoV-2 B.1.351 VOC, with a beneficial effect of Fc-  
445 mediated effector functions. These data extend previous studies describing the participation of  
446 effector functions to in vivo efficacy of SARS-CoV-2 RBD-specific mAbs (32, 35) as well as  
447 influenza A hemagglutinin stem-specific broadly neutralizing mAbs (46, 47). These observations  
448 is reminiscent of similar findings for mAbs targeting a highly conserved epitope on the influenza  
449 virus hemagglutinin stem, and indicate that the combination of mAb cross reactivity with effector  
450 functions may provide particular potency against these viruses (15).

451 The stem helix is presumed to form a 3-helix bundle in prefusion SARS-CoV-2 S and  
452 dynamic conformational changes are likely required to expose the otherwise buried hydrophobic  
453 epitope, which is surrounded by conserved glycans potentially further shielding this conserved  
454 site. We provide evidence that stem helix-targeted Abs are elicited upon natural infection by  
455 endemic (OC43 or HKU1) or pandemic (SARS-CoV-2) coronaviruses as well as by COVID-19  
456 mRNA vaccines. However, stem helix-specific Abs are present at low titers in plasma samples of



457 convalescent or vaccinated individuals and at low frequency in their memory B cell repertoire  
458 possibly as a result of limited epitope exposure, similarly to the sub-dominance of Abs to the  
459 conserved hemagglutinin stem region of influenza A viruses (46, 48).

460 Stem helix-targeted Abs are predominantly of narrow specificities and only few of them  
461 mediate broad  $\beta$ -coronavirus neutralization and protection through accumulation of somatic  
462 mutations. These findings along with the moderate neutralization potency and low frequency of  
463 such mAbs in COVID-19 convalescent or vaccinated subjects indicate that eliciting high enough  
464 titers of stem helix-targeted mAbs through vaccination will be a key challenge to overcome to  
465 develop pan- $\beta$ -coronavirus vaccines. We propose that harnessing recent advances in  
466 computational protein design, such as epitope-focused vaccine design approaches (49–51) and  
467 multivalent display (52–57), to target the stem helix or the fusion peptide regions might prove  
468 necessary to elicit broad  $\beta$ -coronavirus immunity.

469  
470

471

## 472 **Acknowledgements**

473 We thank Jay C. Nix for x-ray data collection, and Tristan I. Croll for assistance in refinement of  
474 the crystal structure. Thanks to Ann Arvin for her insightful comments. We thank Marcel Meury  
475 for help with protein production. We thank Hideki Tani (University of Toyama) for providing the  
476 reagents necessary for preparing VSV pseudotyped viruses. The authors would also like to thank  
477 Cindy Castado and Normand Blais (GSK Vaccines) for their help in the selection of the genetically  
478 divergent sarbecoviruses used in this study. We thank Promega Corporation for kindly providing  
479 SARS-CoV2 CHO-K1 cells (genetically engineered to stably express a HaloTag-HiBit-tagged).  
480 This study was supported by the National Institute of Allergy and Infectious Diseases  
481 (DP1AI158186 and HHSN272201700059C to D.V., and U01 AI151698-01 to WCVV), a Pew  
482 Biomedical Scholars Award (D.V.), Investigators in the Pathogenesis of Infectious Disease  
483 Awards from the Burroughs Wellcome Fund (D.V.), Fast Grants (D.V.), the Swiss National  
484 Science Foundation (P400PB\_183942 to M.M.S.), the University of Washington Arnold and Mabel  
485 Beckman cryoEM center, the Helmut Horten Foundation (F.S. and the Institute for Research in  
486 Biomedicine). The project was also partially funded by the Swiss Kidney Foundation. Use of the  
487 Stanford Synchrotron Radiation Lightsource, SLAC National Accelerator Laboratory, is supported  
488 by the U.S. Department of Energy, Office of Science, Office of Basic Energy Sciences under  
489 Contract No. DE-AC02-76SF00515. The SSRL Structural Molecular Biology Program is  
490 supported by the DOE Office of Biological and Environmental Research, and by the National  
491 Institutes of Health, National Institute of General Medical Sciences (P30GM133894). The  
492 contents of this publication are solely the responsibility of the authors and do not necessarily  
493 represent the official views of NIGMS or NIH.

494

## 495 **Author contributions**

496 Experiment design: D.P., M.M.S., J.S.L., M.A.T., M.S.P., H.W.V, MB., D.C., D.V. Donors'  
497 Recruitment and Sample Collection: E.C., F.B., B.G., A.C., P.F., P.E.C., O.G., S.C., C.G., A.R.,  
498 L.P., M.S., D.V., C.H.D. Antibody discovery: D.P., MB., J.S.L., J.J., S.J., N.S., K.C., E.C., D.C.  
499 AMBRA preparation: C.S.F., J.B., A.C. Expression and purification of proteins: A.C.W., J.E.B.,  
500 J.J. Antibody functional experiments: D.P., M.M.S., N.C., J.S.L., M.A.T., A.C.W., F.L., J.N., S.B.,  
501 R.M. Bioinformatic analysis of virus diversity and variants: J.d.I., I.B., A.T. Evaluation of effector  
502 functions: B.G. SPR Binding Assays: L.E.R. Neutralization assay: D.P., M.A.T., F.A.L., J.N., M.  
503 P. H. Escape mutants selection and sequencing: H.K., S.I., F.A.L., J.d.I. Effects in the hamster  
504 model and data analysis: R.A., C.F., C.D.K., L.B, L.C, J.N., E.V., F.B. Cryo-EM Data Collection,  
505 Processing, and Model Building, M.M.S., D.V. Crystallization, X-Ray Crystallography Data  
506 Collection, Processing, and Model Building: M.M.S., N.C., G.S., D.V. Serological Assays: D.P.,  
507 R.M. Data Analysis: D.P., M.M.S., M.B., J.S.L., J.J., F.A.L., J.N., N.C., A.M.T., A.C.W., G.S., D.C.,  
508 D.V. Manuscript Writing: D.O.P., M.M.S., J.S.L., M.B., G.S., F.S., A.L., H.W.V, D.C., D.V.

509

## 510 **Competing interests**

511 D.P., N.C., M.P.H., J.N., B.G., L.E.R., J.d.I., H.K., S.I., S.J., N.S., K.C., I.B., S.B., C.S.F, J.B.,  
512 R.M., E.V., F.B., E.C., L.P., M.S.P., M.S., D.H., A.T., F.A.L., C.H.D., A.L., G.S., H.W.V., M.B. and  
513 D.C. are employees of Vir Biotechnology and may hold shares in Vir Biotechnology. D.C., J.S.L,  
514 F.S., A.C. and A.L. are currently listed as an inventor on multiple patent applications, which

515 disclose the subject matter described in this manuscript. D.V. is a consultant for Vir Biotechnology  
516 Inc. The Veessler laboratory and the Sallusto laboratory have received sponsored research  
517 agreements from Vir Biotechnology Inc. The other authors declare no competing interests.

518  
519

## 520 **Materials and Methods**

521

### 522 **Cell lines**

523 Cell lines used in this study were obtained from ATCC (HEK293T and Vero-E6) or ThermoFisher  
524 Scientific (ExpiCHO cells, FreeStyle™ 293-F cells and Expi293F™ cells).

525

### 526 **Sample donors**

527 Samples were obtained from cohorts of individuals enrolled before June 2019 (pre-pandemic), of  
528 SARS-CoV-2 infected individuals or of vaccinated individuals immunized with Moderna or  
529 Pfizer/BioNTech BNT162b2 vaccines under study protocols approved by the local Institutional  
530 Review Boards (Canton Ticino Ethics Committee, Switzerland, the Ethical committee of Luigi  
531 Sacco Hospital, Milan, Italy and WCG North America, Princeton, NJ, US). All donors provided  
532 written informed consent for the use of blood and blood components (such as human peripheral  
533 blood mononuclear cells (PBMCs), sera or plasma) and were recruited at hospitals or as  
534 outpatients. PBMCs were isolated from blood by Ficoll density gradient centrifugation and either  
535 used freshly or stored in liquid nitrogen for later use. Sera were obtained from blood collected  
536 using tubes containing clot activator, followed by centrifugation and stored at -80°C.

537

### 538 **AMBRA (antigen-specific memory B cell repertoire analysis) of IgG antibodies**

539 Replicate cultures of total unfractionated PBMC from SARS-CoV-2 infected or vaccinated  
540 individuals were seeded in 96 U-bottom plates (Corning) in RPMI1640 supplemented with 10%  
541 Hyclone, sodium pyruvate, MEM non-essential amino acid, stable glutamine and Penicillin-  
542 Streptomycin. Memory B cell stimulation and differentiation was induced by adding 2.5 µg/ml  
543 R848 (3 M) and 1000 U/ml human recombinant IL-2 for 10 days at 37 °C 5% CO<sub>2</sub>. The cell culture  
544 supernatants were collected for further analysis.

545

### 546 **Antibody discovery and expression**

547 Antigen specific IgG<sup>+</sup> memory B cells were isolated and cloned from total PBMCs of convalescent  
548 individuals. Abs VH and VL sequences were obtained by reverse transcription PCR (RT-PCR)  
549 and mAbs were expressed as recombinant human IgG1, carrying the half-life extending  
550 M428L/N434S (LS) mutation in the Fc region or Fab fragment. ExpiCHO cells were transiently  
551 transfected with heavy and light chain expression vectors as previously described (21). For in vivo  
552 experiments in Syrian hamsters, S2P6 was produced with a Syrian hamster IgG2 constant  
553 region. Using the Database IMGt (<http://www.imgt.org>), the VH and VL gene family and the  
554 number of somatic mutations were determined by analyzing the homology of the VH and VL  
555 sequences to known human V, D and J genes. UCA sequences of the VH and VL were  
556 constructed using IMGt/V-QUEST.

557 MAbs affinity purification was performed on ÄKTA Xpress FPLC (Cytiva) operated by UNICORN  
558 software version 5.11 (Build 407) using HiTrap Protein A columns (Cytiva) for full length human

559 and hamster mAbs and CaptureSelect CH1-XL MiniChrom columns (ThermoFisher Scientific) for  
560 Fab fragments, using PBS as mobile phase. Buffer exchange to the appropriate formulation buffer  
561 was performed with a HiTrap Fast desalting column (Cytiva). The final products were sterilized  
562 by filtration through 0.22 µm filters and stored at 4°C.

563

#### 564 **Flow cytometry of antibody on S Protein expressing ExpiCHO-S cells**

565 For Expi-CHO cell transient transfection, S plasmids (21, 58) were diluted in cold OptiPRO SFM,  
566 mixed with ExpiFectamine CHO Reagent (Life Technologies, A29130) and added to the cells  
567 seeded at  $6 \times 10^6$  cells/ml in a volume of 5 ml in a 50 ml bioreactor. Transfected cells were  
568 incubated at 37°C, 8% CO<sub>2</sub> with an orbital shaking speed of 209 rpm (orbital diameter of 25 mm)  
569 for 42 hours. To test mAb binding, transfected ExpiCHO cells were collected, washed twice in  
570 wash buffer (1% w/v solution of Bovine Serum Albumin (BSA; Sigma) in PBS, 2 mM EDTA) and  
571 distributed at 60,000 cells/well into 96 U-bottom plates (Corning). mAb serial dilutions from 10  
572 µg/ml were added onto cells for 30 minutes on ice and, after two washes, Alexa Fluor647-labelled  
573 Goat Anti-Human IgG (Jackson Immunoresearch, 109-606-098) was used for detection. After 15  
574 minutes of incubation on ice, cells were washed twice and mAb binding analyzed by flow  
575 cytometry using a ZE5 Cell Analyzer (Biorard).

576

#### 577 **Protein expression and purification**

578 SARS-CoV-2 S 2P, SARS-CoV S 2P, MERS-CoV S 2P, OC43 S, HKU1 S2P, and HKU4 S2P  
579 ectodomains were produced as previously described (3, 11, 12, 59, 60). SARS-CoV-2 S D614G,  
580 used for production of SARS-CoV-2 postfusion, contains a mu-phosphatase signal peptide  
581 beginning at 14Q, a mutated S<sub>1</sub>/S<sub>2</sub> cleavage site (SGAR), and ends at residue K1211 followed by  
582 a TEV cleavage, foldon trimerization motif, and an 8X his tag in a pCMV vector. Briefly,  
583 spike glycoproteins were produced in Expi293F cells grown in suspension using Expi293  
584 expression medium (Life Technologies) at 37°C in a humidified 8% CO<sub>2</sub> incubator rotating at 130  
585 rpm. The cultures were transiently transfected using PEI with cells grown to a density of 3 million  
586 cells per mL and cultivated for 3 days. The supernatant was clarified and affinity purified using a  
587 1 mL HisTrapFF column (Cytiva). To isolate post-fusion SARS-CoV-2 S, SARS-CoV-2 S D614G  
588 ectodomain was incubated for one hour with the S2X58 triggering Fab (61) and 1 µg/ml trypsin  
589 before size-exclusion chromatography purification using a Superose 6 Increase 10/24 column  
590 (Cytiva). Purified protein was concentrated, quantified using absorption at 280 nm, and flash  
591 frozen in Tris-saline (20 mM Tris pH 8.0, 100 mM NaCl).

592

593

#### 594 **Enzyme-linked immunosorbent assay (ELISA)**

595 96-well plates (Corning) were coated overnight at 4°C with recombinant proteins at 1 µg/ml or  
596 peptides at 8 µg/ml diluted in phosphate-buffered saline (PBS). Plates were blocked with a 1%  
597 w/v solution of Bovine Serum Albumin (BSA; Sigma) in PBS and serial dilutions of mAbs were  
598 added for 1 hour at room temperature. When testing human plasma or memory B-cell  
599 supernatants, plates were blocked with Blocker Casein (1% w/v) in PBS (Thermo Fisher  
600 Scientific) supplemented with 0.05% Tween 20. Plasma and memory B-cell supernatants  
601 (AMBRA testing) were then incubated for 1 hour at room temperature at a 1:10 and 1:2 dilution,  
602 respectively. After further wash, mAbs bound were revealed using an anti-human IgG coupled to

603 alkaline phosphatase (Jackson ImmunoResearch) incubated for 1 hour. Substrate (p-NPP, Sigma)  
604 was used for color development and plates read at 405 nm by a microplate reader (Biotek). The  
605 data were plotted with GraphPad Prism software.

606 For ELISA with plasma, cut-off value (OD=0.7) was determined based on signal of pre-pandemic  
607 samples and binding to uncoated ELISA plates. For AMBRA, cut off value (OD= 0.4) was  
608 determined as three times the mean OD values of negative wells.

609

### 610 **Blockade of SARS-CoV-2 S binding to ACE2**

611 SARS-CoV-2 S prefusion (final concentration 300 ng/ml) was incubated with 1 µg/ml of S309  
612 mouse Fc-tagged mAb (S309-mFc) 30 minutes at 37°C before the addition of serially diluted S2P6  
613 (from 20 µg/ml) and incubated for additional 30 minutes at 37°C. The complex S:S309:S2P6 was  
614 then added to a pre-coated hACE2 (2 µg/ml in PBS) 96-well plate MaxiSorp (Nunc) and incubated  
615 1 hour at room temperature. Subsequently, the plates were washed and a goat anti-mouse IgG  
616 (Southern Biotech) coupled to alkaline phosphatase (Jackson ImmunoResearch) added to detect  
617 SARS-CoV-2 S:S309-mFc binding. After further washing, the substrate (p-NPP, Sigma) was  
618 added, and plates read at 405 nm using a microplate reader (Biotek). The percentage of inhibition  
619 was calculated as follow:  $(1 - ((\text{OD sample} - \text{OD neg. ctr}) / (\text{OD pos. ctr} - \text{OD neg. ctr})) * 100$ .

620

### 621 **Epitope identification and substitution scan**

622 PEPperMAP Epitope Mapping (PEPperPRINT GmbH, Heidelberg, Germany) was performed to  
623 determine mAbs epitope through a pan-corona Spike protein Microarray covering the S proteins  
624 of all β-coronaviruses. Briefly, microarray containing 15-mer peptides (overlapping of 13-mer) was  
625 incubated with 10 µg/ml mAb for 16 hours at 4°C shaking at 140 rpm followed by staining with  
626 Goat anti-human IgG (H+L) DyLight680 for 45 minutes at room temperature. Microarray read-out  
627 was performed with a LI-COR Odyssey Imaging System at scanning intensities of 7/7 (red/green).  
628 Epitope substitution scan was performed on the identified epitope based on a stepwise single  
629 amino acid exchange on all amino acid positions. The mAbs binding to the generated microarray  
630 was performed as above.

631

### 632 **Conservation analysis**

633 Conservation analysis was performed as described previously (Pinto et al 2020). SARS-CoV-2  
634 S sequences were obtained from GISAID (<https://www.gisaid.org/>) on Apr 22<sup>nd</sup> 2021, the other  
635 viruses sequences were obtained from NCBI Virus  
636 (<https://www.ncbi.nlm.nih.gov/labs/virus/vssi/#/>) in December 2020. The multiple sequences  
637 alignment was performed using MAFFT (<https://mafft.cbrc.jp/alignment/software/>) with the spike  
638 amino acid sequences as input.

639

### 640 **SPR binding measurements**

641 SPR binding measurements were performed using a Biacore T200 instrument using anti-AviTag  
642 pAb covalently immobilized on CM5 chips to capture S ECDs except the Cytiva Biotin CAPture  
643 kit was used to capture biotinylated OC43 S ECD. Running buffer was Cytiva HBS-EP+ (pH 7.4)  
644 or 20 mM phosphate pH 5.4, 150 mM NaCl, 0.05% P-20, for neutral or acidic pH experiments,  
645 respectively. All measurements were performed at 25 °C. S2P6 Fab or IgG concentrations were  
646 11, 33, 100, and 300 nM run as single-cycle kinetics. Double reference-subtracted data were fit  
647 to a binding model using Biacore Evaluation software. All data for SARS-CoV-2 S, SARS-CoV S,

648 and OC43 S were fit to a 1:1 binding model. Data for MERS S were fit to a Heterogeneous Ligand  
649 binding model, due to a kinetic phase with very slow dissociation presumed to be an artifact; the  
650 lower affinity of the two KDs returned by the fit is reported as the KD of the S2P6:MERS S  
651 interaction and is indicated to be approximate (the Rmax associated with the higher affinity kinetic  
652 phase is proportional to the magnitude of the final signal above baseline). Data for HKU1 S were  
653 fit to a steady-state binding model, because of the low signal and fast approach to equilibrium  
654 within each association phase; the reported KD is indicated to be approximate. IgG binding data  
655 yield an “apparent KD” due to avidity.

656

### 657 **Neutralization of authentic SARS-CoV-2 virus**

658 For SARS-CoV-2 neutralization experiments, cells were cultured in DMEM (Gibco 11995-040)  
659 supplemented with 10% FBS (VWR 97068-085 lot#345K19) and 100 U/ml Penicillin-Streptomycin  
660 (Gibco 15140-122). Cells were seeded in black, 96-well glass bottom plates (Cellvis P96-1.5H-N)  
661 at a density of 20,000 cells/well. In a BSL3 facility, serial dilutions of mAbs (1:4) were incubated  
662 with 200 PFU (plaque forming units, corresponding to a multiplicity of infection of 0.01) of authentic  
663 SARS-CoV-2 (isolate USA-WA1/2020, passage 3, passaged in Vero-E6 cells) for 30 minutes at  
664 37°C. After removal of cell culture supernatants, cells were infected with the virus:mAb mixtures  
665 and incubated for 20 hours at 37°C. Cells were then fixed with 4% paraformaldehyde (Electron  
666 Microscopy Sciences, 15714-S) in PBS (Gibco 10010-031) for 30 minutes, permeabilized with  
667 0.1% Triton X-100 (Sigma, X100-500ML) for 30 minutes, and stained with Human SARS  
668 Coronavirus Nucleoprotein/NP Ab, Rabbit Mab (Sino Biological, 40143-R001) at a dilution of  
669 1:2000 dilution in 2% milk (RPI, M17200-500.0) for 1 hour. Subsequently, cells were stained with  
670 Goat anti-Rabbit IgG (H+L) AF647 (Invitrogen, Cat. A21245 Lot. 223 2862) at a dilution of 1:1000  
671 and 2 ug/ml Hoechst 33342 in 2% milk for 1 hour. Plates were imaged with an automated  
672 microscope (Cytation5, Biotek), and nuclei and cells positive for the SARS-CoV-2 Nucleoprotein  
673 were quantified using the supplied Gen5 software.

674

### 675 **VSV pseudotype virus production and neutralization**

676 Sarbecovirus spike cassettes with a C-terminal deletion of 19 amino acids (D19) were synthesized  
677 and cloned into mammalian expression constructs (pcDNA3.1(+) or pTwist-CMV) for the following  
678 Sarbecoviruses: SARS-CoV-2 (Accession QOU99296.1), SARS-CoV-1 (Accession  
679 AAP13441.1), hCoV-19/pangolin/Guangdong/1/2019 (GD19, Accession QLR06867.1), and  
680 Middle East respiratory syndrome-related coronavirus (MERS, Accession YP\_009047204). To  
681 generate pseudotyped VSV, 293T Lenti-X packaging cells (Takara, 632180) were seeded in 15  
682 cm dishes such that the cells would be 80% confluent the following day. Cultures were then  
683 transfected with various S expression plasmids using TransIT-Lenti transfection reagent (Mirus,  
684 6600) according to the manufacturer’s instructions. 24 hours after transfection, the packaging  
685 cells were infected with VSV-G\*ΔG-Luciferase (Kerafast, EH1020-PM). 48 hours after infection  
686 the supernatant containing Sarbecovirus pseudotyped VSV-luc was collected, centrifuged at 1000  
687 × g for 5 minutes, aliquoted and frozen at -80°C.

688

689 To perform pseudotype neutralization assays, VeroE6-TMPRSS2 cells were used for VSV-SARS-  
690 CoV-2, VSV-SARS-CoV-1, and VSV-GD19 and Huh7 cells were used for VSV-MERS. Cells were  
691 seeded into clear bottom white-walled 96-well plates at 20,000 cells/well. The following day, 1:3

692 serial dilutions of Ab were prepared in DMEM and pseudotyped VSVs (final dilution 1:20) were  
693 added to each mAb dilution and incubated for 1 hour at 37°C. Media was removed from the cells  
694 and replaced with 50 µl of pseudotype:mAb complex and one hour post-infection, 50 µl of  
695 complete culture media was added to the cells and incubated overnight at 37°C. The media from  
696 infected cells was then removed and 100 µl of 1:1 diluted PBS:Bio-Glo (Promega, G7940)  
697 luciferase substrate was added to each well. The plates were shaken at 300 rpm at room  
698 temperature for 10 minutes and relative light units (RLUs) were then read on an EnSight  
699 microplate reader (Perkin Elmer). Percent neutralization was determined by subtracting the mean  
700 background (uninfected cells with luciferase substrate alone) values of 6 wells per plate from all  
701 data points. Percent neutralization for each mAb concentration was calculated relative to control  
702 wells receiving no mAb for each plate. Percent neutralization data were analyzed using GraphPad  
703 Prism. Absolute IC<sub>50</sub> values were calculated by fitting a curve using a variable slope 4 parameter  
704 non-linear regression model and values were interpolated from the curve at y=50.

705  
706 Production of OC43 S (AAT84354.1) pseudotyped VSV virus and neutralization assays was  
707 performed similarly to previously described (12). Briefly, HEK-293T cells at 70~80% confluency  
708 were transfected with the pCDNA3.1 expression vectors encoding full-length OC43 S harboring  
709 a truncation of the 17 C-terminal residues along with a fusion to Ha-tag and the bovine coronavirus  
710 hemagglutinin esterase protein Fc-tagged at molar ratios of 7:1. The day after, cells were  
711 transduced with VSV $\Delta$ G/Fluc (20). After 2 h, infected cells were washed four times with DMEM  
712 before adding medium supplemented with anti-VSV-G antibody (I1- mouse hybridoma  
713 supernatant diluted 1 to 25, from CRL- 2700, ATCC). Supernatant was harvested 18-24 h post-  
714 inoculation, clarified from cellular debris by centrifugation at 2,000 x g for 5 min and concentrated  
715 10 times using a 30 kDa cut off membrane and aliquoted and frozen at -80°C until use in  
716 neutralization experiments. For viral neutralization, stable HRT-18G cells (ATCC) in DMEM  
717 supplemented with 10% FBS, 1% PenStrep were seeded at 40,000 cells/well into clear bottom  
718 white walled 96-well plates and cultured overnight at 37°C. Twelve-point 3-fold serial dilutions of  
719 S2P6 were prepared in DMEM and OC43 S VSV pseudoviruses were added 1:1 (v/v) to each  
720 dilution in the presence of anti-VSV-G antibody from I1- mouse hybridoma supernatant diluted 50  
721 times (final volume: 50 µl). After 45 min incubation at 37 °C, 40 µl of the mixture was added to the  
722 cells and 2 h post-infection, another 40 µL DMEM were added to avoid evaporation. After 17-20  
723 h, 50 µL/well of One-Glo-EX substrate (Promega) were added to the cells and incubated in the  
724 dark for 5-10 min prior reading on a Varioskan LUX plate reader (ThermoFisher). Data was  
725 processed using GraphPad Prism v9.0.

726

## 727 **Selection of VSV-SARS-CoV-2 mAb escape mutants**

### 728 *Resistant virus selection*

729 Cells were cultured in DMEM (Gibco 11995-040) supplemented with 10% FBS (VWR 97068-085  
730 lot#345K19) and 100 U/ml Penicillin-Streptomycin (Gibco 15140-122). The day before infection,  
731 250,000 VeroE6-TMPRSS2 cells were seeded in 12-well plates in 2 ml of DMEM (Gibco 11995-  
732 040) supplemented with 10% FBS (VWR 97068-085 lot#345K19) and 100 U/ml Penicillin-  
733 Streptomycin (Gibco 15140-122) and incubated overnight at 37C. The next day, S2P6 was serially  
734 diluted 1:4 starting at 80 µg/ml in infection media (DMEM supplemented with 2% FBS and 20mM  
735 HEPES (Gibco, 15630-080)) and incubated with replication-competent VSV-SARS-CoV-2 (23) at

736 MOI 2 for 1 hour at 37°C. A no Ab control was included to account for any tissue culture  
737 adaptations and quasispecies variability that may occur during virus replication. The mAb-virus  
738 complexes were adsorbed on the cells for 1 hour at 37°C, with manual rocking every 15 minutes.  
739 After adsorption, cells were washed with PBS and overlaid with infection media containing an  
740 equivalent amount of S2P6 as was used for the initial infection. Infection was monitored visually  
741 by microscopy for GFP expression and cytopathic effect (CPE) of the cells at day 1 and day 3  
742 post-infection. At day 3 post-infection, when the no mAb control well reached >50% CPE, the well  
743 with the highest Ab concentration showing >20% CPE (in this case the 80 ug/ml well) was  
744 selected for passaging. The cell supernatant was centrifuged to remove cell debris, diluted 1:10  
745 in infection medium and added to fresh VeroE6-TMPRRS2 cells with the same S2P6  
746 concentration range and treatment as for the initial passage. Selection was stopped after two  
747 passages, after no virus neutralization was observed at the highest concentration tested.

748

#### 749 *Sequencing of S gene*

750 Viral RNA was extracted from the supernatant of viral passages using the QIAamp Viral RNA Mini  
751 Kit (Qiagen, 52904) according to the manufacturer's instructions, without the addition of carrier  
752 RNA. Reverse transcription reactions were performed with 6 µl of purified RNA and random  
753 primers using the NEB ProtoScript II First Strand cDNA Synthesis Kit (NEB, E6560S), according  
754 to manufacturer's instructions. The resulting cDNA was used as a template for PCR amplification  
755 of the spike gene using the KapaBiosystems polymerase (KAPA HiFi HotStart Ready PCR Kit  
756 KK2601) with primers 5'- CGAGAAAAAGGCATCTGGAG -3' and 5'-  
757 CATTGAACTCGTCGGTCTC -3'. Amplification conditions included an initial 3 minutes at 95°C,  
758 followed by 28 cycles with 20 seconds at 98°C, 15 seconds at 59°C and 72°C for 2 minutes, with  
759 a final 4 minutes at 72°C. PCR products were purified using AMPure XP beads (Beckman Coulter,  
760 A63881) following manufacturer's instructions. The size of the amplicon was confirmed by  
761 analyzing 2 µl of PCR products using the Agilent D5000 ScreenTape System (Agilent D5000  
762 ScreenTape, 5067-5588, Agilent D5000, Reagents 5067-5589). Products were quantified by  
763 analyzing 2 µl with the Quant-iT dsDNA High-Sensitivity Assay Kit (Thermo Fisher, Q331120).  
764 Twenty ng of purified PCR product was used as input for library construction using the NEBNext  
765 Ultra II FS DNA Library Prep Kit (NEB, E6177S) following manufacturer's instructions. DNA  
766 fragmentation was performed for 13 minutes. NEBNext Multiplex Oligos for Illumina Dual Index  
767 Primer Set 1 (NEB, E7600S) was used for library construction, with a total of 6 PCR cycles.  
768 Libraries size was determined using the Agilent D1000 ScreenTape System (Agilent D1000  
769 ScreenTape, 5067-5582, Agilent D5000 Reagents, 5067-5583) and quantified with the Quant-iT  
770 dsDNA High-Sensitivity Assay Kit. Equal amounts of each library were pooled together for  
771 multiplexing and 'Protocol A: Standard Normalization Method' of the Illumina library preparation  
772 guide was used to prepare 8 pM final multiplexed library with 1% PhiX spike-in for sequencing.  
773 The Illumina MiSeq Reagent Kit v3 (600-cycle) (Illumina, MS-102-300) was used for sequencing  
774 the libraries on the Illumina MiSeq platform, with 300 cycles for Read 1, 300 cycles for Read 2, 8  
775 cycles for Index 1, and 8 cycles for Index 2.

776

#### 777 *Bioinformatic analysis*

778 The average read length after running Illumina's Bcl2fastq command was ranging from 149 to  
779 188bp on average per sample. For consistency across samples, paired-end reads were initially



780 trimmed to 2X150bp and further cleaned to remove Illumina's adapter and low quality bases using  
781 Trimmomatic (62). Read alignment was performed with Burrows- Wheeler Aligner (BWA (63))  
782 using a custom reference sequence. Variants were called with LoFreq upon indel realignment  
783 and base quality recalibration (64), using a frequency threshold of 1%. Two consecutive rounds  
784 of alignments and variant calling were performed, where the variants called during the first round  
785 at allelic frequency >50% were integrated in the reference for the second round in order to adjust  
786 alignment rate and variant calling accuracy. Variants were annotated with SnpEff (65). The  
787 reference sequence coordinates were mapped back to the SARS-CoV-2 Wuhan-Hu-1 sequence  
788 (NCBI: NC\_045512.2) in order to match the reference sequence nomenclature. Extensive QCs  
789 were performed at read, alignment and variant level using FastQC , samtools, picard, mosdepth  
790 (66), bcftools\_ (67), MultiQC (68) and in-house scripts, notably to remove variants that were  
791 consistently called at a static position in reads (such as the beginning or end of reads that were  
792 carrying it, rather than being randomly distributed throughout those reads.). An end-to-end  
793 workflow was automated using NextFlow (69). All programs are available through the Bioconda  
794 Initiative (70)([bioconda.github.io](https://bioconda.github.io)).

795

### 796 **Crystallization and structure determination**

797 Crystals of the S2P6 Fab/SARS-CoV peptide complex were obtained using the sitting-drop vapor  
798 diffusion method at 20°C with a Fab concentration of 12 mg/ml and a 1.5x molar excess of peptide.  
799 A total of 150 nl S2P6 Fab/peptide solution in 20 mM Tris-HCl pH 7.5, 50 mM NaCl were mixed  
800 with 150 nl mother liquor containing 0.2 M ammonium sulfate, 0.1 M sodium acetate pH 4.6 and  
801 25% (v/v) PEG Smear Broad (Molecular Dimensions). Crystals were flash frozen in liquid  
802 nitrogen. Data were collected at beamline 12-2 at the Stanford Synchrotron Radiation Lightsource  
803 facility in Stanford, CA. Data were processed with the XDS software package (Kabsch, 2010) for  
804 a final dataset of 2.67 Å in space group P6<sub>5</sub>22. The S2P6 Fab/peptide complex structure was  
805 solved by molecular replacement using a homology model of the S2P6 Fab built using the  
806 Molecular Operating Environment (MOE) software package from the Chemical Computing Group  
807 (<https://www.chemcomp.com>). Several subsequent rounds of model building and refinement were  
808 performed using Coot (71), ISOLDE (72), Refmac5 (73), and MOE, to arrive at a final model for  
809 the complex.

810

### 811 **Measurement of Fc-effector functions**

#### 812 *MAb-dependent activation of human FcγRIIIa and FcγRIIa*

813 Determination of mAb-dependent activation of human FcγRIIIa and FcγRIIa was performed using  
814 ExpiCHO cells stably expressing full-length wild-type SARS-CoV-2 spike (S) (target cells). Cells  
815 were incubated with different amounts of mAbs for 10 minutes before incubation with Jurkat cells  
816 stably expressing FcγRIIIa receptor (V158 variant) or FcγRIIa receptor (H131 variant) and NFAT-  
817 driven luciferase gene (effector cells) at an effector to target ratio of 6:1 for FcγRIIIa and 5:1 for  
818 FcγRIIa. Activation of human FcγRs was quantified by the luciferase signal produced as a result  
819 of NFAT pathway activation. Luminescence was measured after 21 hours of incubation at 37°C  
820 with 5% CO<sub>2</sub> with a luminometer using the Bio-Glo-TM Luciferase Assay Reagent according to  
821 the manufacturer's instructions (Promega, Cat. Nr.: G7018 and G9995).

822

#### 823 *Antibody-dependent cell cytotoxicity (ADCC)*

824 ADCC assays were performed using SARS-CoV2 CHO-K1 cells (genetically engineered to stably  
825 express a HaloTag-HiBit-tagged) as target cells and PBMC as effector cells at a E:T ratio of 33:1.  
826 HiBit-cells were seeded at 3,000 cells/well and incubated for 16 hours at 37°C, while PBMCs  
827 isolated from fresh blood (VV donor) were cultivated overnight at 37°C 5% CO<sub>2</sub> in the presence  
828 of 5 ng/ml of IL-2. The day after, media was removed and titrated concentrations of mAbs were  
829 added before the addition of PBMCs at 100,000 cells/well. As 100% specific lysis, Digitonin at  
830 100 ug/ml was used. After 4 hours of incubation at 37°C, ADCC was measured with Nano-Glo  
831 HiBiT Extracellular Detection System (Promega; Cat. Nr.: N2421) using a luminometer  
832 (Integration Time 00:30).

833

#### 834 *Antibody-dependent cellular phagocytosis (ADCP)*

835 ADCP was performed using CHO cells stably expressing full-length wild-type SARS-CoV-2 S  
836 glycoprotein (target cells) fluorescently labelled with PKH67 Fluorescent Cell Linker Kits (Sigma  
837 Aldrich; Cat. Nr.: MINI67). Target cells were incubated with titrated concentrations of mAbs for 10  
838 minutes, followed by incubation with PBMCs fluorescently labelled with Cell Trace Violet  
839 (Invitrogen, cat. no. C34557) after an overnight incubation in 5 ng/ml IL-2 (Recombinant Human  
840 Interleukin-2; ImmunoTools GmbH; Cat. Nr.: 11340027). An effector:target ratio of 20:1 was used.  
841 After an overnight incubation at 37°C, cells were stained with anti-human CD14-APC Ab (BD  
842 Pharmingen, cat. no. 561708, Clone M5E2) to stain monocytes. ADCP was determined by flow  
843 cytometry, gating on CD14+ cells that were double-positive for cell trace violet and PKH67.

844

#### 845 *Complement-dependent cytotoxicity (CDC)*

846 CDC was performed on CHO cells stably expressing SARS-CoV-2 S glycoprotein (target cells)  
847 incubated with serial dilutions of mAbs for 10 minutes, followed by incubation with pre-adsorbed  
848 Low-Tox M Rabbit Complement (Cederlane Laboratories Limited; Cat. Nr.: CL3051) at a final  
849 dilution of 1:12. CDC was measured after incubation for 3 hours at 37 °C 5% CO<sub>2</sub> with a  
850 luminometer using the CytoTox-Glo Cytotoxicity Assay (Promega; Cat. Nr.: G9291) according to  
851 the manufacturer's instructions.

852

#### 853 **S2P6 binding and S2P6/B6 competition experiments to different synthetic coronavirus S** 854 **stem peptides**

855 All biotinylated coronavirus stem helix peptides binding experiments were performed in PBS  
856 supplemented with 0.005 % Tween20 (PBST) at 30°C and 1,000 rpm shaking on an Octet Red  
857 instrument (Fortebio). For S2P6 binding to different stem helix peptides, 1 µg/ml biotinylated stem  
858 peptide (15- or 16-residue long stem peptide-PEG6-Lys-Biotin synthesized from Genscript) was  
859 loaded on SA biosensors to a threshold of 0.5 nm. Then, the system was equilibrated in PBST for  
860 300 seconds prior to immersing the sensors in 0.1 µM S2P6 mAb, respectively, for 300 seconds  
861 prior to dissociation in buffer for 300 seconds. For S2P6-B6 competition, 1 µg/ml biotinylated to  
862 SARS CoV-2 peptide was loaded on SA biosensors to a threshold of 0.5 nm. The system was  
863 equilibrated in PBST for 180 seconds and each subsequent step was monitored for 900 seconds.  
864 The first sample biosensor was immersed in 0.1 µM mAb S2P6 prior to immersing the sample  
865 biosensor in a solution of 0.1 µM mAb S2P6 and B6, respectively. The second sample biosensor  
866 was immersed in PBST and subsequently in 0.1 µM mAb B6. To monitor unspecific binding,  
867 identical experiments were performed without loading stem peptides to the biosensors.

868

### 869 **CryoEM sample preparation and data collection**

870 1 mg/ml SARS-CoV-2 S 2P was incubated with 1.5-fold molar excess of S2M11 Fab for 30  
871 minutes at 37°C (to promote the closed trimer conformation). Excess S2M11 Fab was removed  
872 from the sample using a centrifugal filter (amicon ultra, 100kDa cut off). Then a 2-fold molar  
873 excess of S2P6 Fab over SARS-CoV-2 S protomer was added to the solution and incubated for  
874 additional 45 minutes at 37°C. 3 µl sample were applied on to a freshly glow discharged UltraAUfoil  
875 Au 200 (R2/2) grid. Plunge freezing was performed using a TFS Vitrobot Mark IV (blot force: 0,  
876 blot time: 6.5 s, Humidity: 100 %, temperature: 23°C). Data were acquired using a FEI Titan Krios  
877 transmission electron microscope operated at 300 kV and equipped with a Gatan K3 Summit  
878 direct detector and Gatan Quantum GIF energy filter, operated in zero-loss mode with a slit width  
879 of 20 eV. Automated data collection was carried out using Leginon (74) at a nominal magnification  
880 of 105,000x with a pixel size of 0.4215Å. The dose rate was adjusted to 15 counts/pixel/s, and  
881 each movie was acquired in super-resolution mode fractionated in 75 frames of 40 ms. Tilted data  
882 collection (45° tilt) was performed to compensate for preferential specimen orientation and 6,015  
883 micrographs were collected in a single session with a defocus range comprised between 0.5 and  
884 5.0 µm.

885

### 886 **CryoEM data processing**

887 Movie frame alignment, estimation of the microscope contrast-transfer function parameters,  
888 particle picking and extraction were carried out using Warp (75). Particle images were extracted  
889 with a box size of 1024 pixels<sup>2</sup> binned to 256 pixels<sup>2</sup> yielding a pixel size of 1.686 Å. Two rounds  
890 of reference-free 2D classification were performed using cryoSPARC (76) to select well-defined  
891 particle images. Subsequently, one round of 3D classification with 25 iterations was carried out  
892 using Relion without imposing symmetry and using an initial ab initio model created in  
893 cryoSPARC.

894 The best subclasses were combined and non-uniform refinement (NUR), defocus refinement (DR)  
895 and NUR again performed in cryoSPARC. We then performed one round of global CTF  
896 refinement of beam-tilt, trefoil and tetrafoil parameters followed by another refinement cycle of  
897 NUR-DR-NUR. Selected particle images were then subjected to Bayesian polishing in Relion (77).  
898 During this step the box and pixel size were changed to 426 pixels and 1.201 Å, respectively,  
899 before performing another NUR-DR-NUR refinement cycle. We then performed one additional  
900 round of focused classification in Relion with 25 iterations, skipping the oriental assignment and  
901 using a mask covering the strongest S2P6 Fab density and a small part of the S stem to further  
902 separate distinct S2P6 Fab conformations. The best classes were combined and a final round of  
903 NUR performed. Reported resolutions are based on the gold-standard Fourier shell correlation  
904 (FSC) of 0.143 criterion and Fourier shell correlation curves were corrected for the effects of soft  
905 masking by high-resolution noise substitution (78).

906

### 907 **CryoEM model building and analysis**

908 UCSF Chimera (79) was used to fit atomic models into the cryoEM maps. The SARS-CoV-2 S  
909 EM structure in complex with the variable domain of the S2M11 Fab (PDB 7K43, residue 15-  
910 1140), the constant domain of the S2H14 Fab crystal structure and the S2P6-SARS-CoV-2  
911 (residue 1146-1159) crystal structure were fit into the cryoEM map.

912

### 913 **Fusion inhibition assay**

914 For testing inhibition of spike-mediated cell–cell fusion Vero-E6 cells were seeded in 96 well  
915 plates at 20,000 cells/ well in 70 µl DMEM with high glucose and 2.4% FBS (Hyclone). After 16  
916 hours, cells were transfected with SARS-CoV-2-S-D19\_pcDNA3.1 as follows: for 10 wells, 0.57  
917 µg plasmid SARS-CoV-2- S-D19\_pcDNA3.1 were mixed with 1.68 µl X-tremeGENE HP in 30 µl  
918 OPTIMEM. After 15 minutes incubation, the mixture was diluted 1:10 in DMEM medium and 30  
919 µl was added per well. A 4-fold serial dilution mAb was prepared and added to the cells, with a  
920 starting concentration of 20 µg/ml. The following day, 30 µl 5X concentrated DRAQ5 in DMEM  
921 was added per well and incubated for 2 hours at 37°C. Nine images of each well were acquired  
922 with a Cytation 5 equipment for analysis.

923

### 924 **In vivo mAb testing using a Syrian hamster model**

925 KU LEUVEN R&D has developed and validated a SARS-CoV-2 Syrian Golden hamster infection  
926 model (36).

927

#### 928 *SARS-CoV-2 virus production*

929 The wt SARS-CoV-2 strain used in this study, BetaCov/Belgium/GHB-03021/2020 (EPI ISL 109  
930 407976|2020-02-03), was recovered from a nasopharyngeal swab taken from an RT-qPCR  
931 confirmed asymptomatic patient who returned from Wuhan, China in the beginning of February  
932 2020. A close relation with the prototypic Wuhan-Hu-1 2019-nCoV (GenBank accession 112  
933 number MN908947.3) strain was confirmed by phylogenetic analysis. Infectious virus was isolated  
934 by serial passaging on HuH7 and Vero-E6 cells (36); passage 6 virus was used for the study  
935 described here. The titer of the virus stock was determined by end-point dilution on Vero-E6 cells  
936 by the Reed and Muench method (80). The variant strain B.1.351 (hCoV-19/Belgium/reg-  
937 1920/2021; EPI\_ISL\_896474, 2021-01-11) was isolated from nasopharyngeal swabs taken from  
938 a traveler returning to Belgium and developing respiratory symptoms. The patients'  
939 nasopharyngeal swabs were directly subjected to sequencing on a MinION platform (Oxford  
940 Nanopore) (Abdelnabi et al <https://www.biorxiv.org/content/10.1101/2021.02.26.433062v1>).

941 Live virus-related work was conducted in the high-containment A3 and BSL3+ facilities of the KU  
942 Leuven Rega Institute (3CAPS), under licenses AMV 30112018 SBB 219 2018 0892 and AMV  
943 23102017 SBB 219 20170589 according to institutional guidelines.

944

#### 945 *SARS-CoV-2 infection model in hamsters*

946 Wildtype Syrian hamsters (*Mesocricetus auratus*) were purchased from Janvier Laboratories and  
947 were housed per two in ventilated isolator cages (IsoCage N Biocontainment System, Tecniplast)  
948 with ad libitum access to food and water and cage enrichment (wood block). Housing conditions  
949 and experimental procedures were approved by the ethical committee of animal experimentation  
950 of KU Leuven (license P065-2020). Female hamsters of 6-10 weeks old were anesthetized with  
951 ketamine/xylazine/atropine and inoculated intranasally with 50 µl containing  $2 \times 10^6$  or  $1 \times 10^4$   
952 TCID50 for wt or B.1.351 variant, respectively. Treatment with mAb (human or hamster S2P6 (2-  
953 20 mg/kg) was initiated either 24) or 48 hours before infection by intraperitoneal injection.  
954 Hamsters were monitored for appearance, behavior and body weight. At day 4 post-infection,  
955 hamsters were euthanized by intraperitoneal injection of 500 µl Dolethal (200 mg/ml sodium

956 pentobarbital, Vétoquinol SA). Lungs were collected, and viral RNA and infectious virus were  
957 quantified by RT-qPCR and end-point virus titration, respectively. Blood samples were collected  
958 before infection for pharmacokinetics analysis.

959

#### 960 *SARS-CoV-2 RT-qPCR*

961 Hamster tissues were collected after sacrifice and were homogenized using bead disruption  
962 (Precellys) in 350 µl RLT buffer (RNeasy Mini kit, Qiagen) and centrifuged (10,000 rpm, 5 minutes)  
963 to pellet the cell debris. RNA was extracted according to the manufacturer's instructions. To  
964 extract RNA from serum, a NucleoSpin kit (Macherey-Nagel) was used. 4 µl out of 50 µl eluate  
965 were used as a template in RT-qPCR reactions. RT-qPCR was performed on a LightCycler96  
966 platform (Roche) using the iTaq Universal Probes One-Step RTqPCR kit (BioRad) with N2  
967 primers and probes targeting the nucleocapsid (36). Standards of SARS-CoV-2 cDNA (IDT) were  
968 used to express viral genome copies per mg tissue or per ml serum.

969

#### 970 *End-point virus titrations*

971 Lung tissues were homogenized using bead disruption (Precellys) in 350 µl minimal essential  
972 medium and centrifuged (10,000 rpm, 5 minutes, 4°C) to pellet the cell debris. To quantify  
973 infectious SARS-CoV-2 particles, endpoint titrations were performed on confluent Vero-E6 cells  
974 in 96-well plates. Viral titers were calculated by the Reed and Muench method (80) using the  
975 Lindenbach calculator and were expressed as 50% tissue culture infectious dose (TCID50) per  
976 mg tissue.

977

978

979 **Supplementary Information**

980

981 **Table S1: CryoEM data collection and refinement statistics.**

982

|                                                  | S2P6/SARS-CoV-2 S<br>(C3 map, post polishing) | S2P6/SARS-CoV-2 S<br>(C1 map, before polishing) |
|--------------------------------------------------|-----------------------------------------------|-------------------------------------------------|
| <b>Data collection</b>                           |                                               |                                                 |
| Magnification                                    |                                               | 105,000                                         |
| Voltage (kV)                                     |                                               | 300                                             |
| Total exposure (e <sup>-</sup> /Å <sup>2</sup> ) |                                               | 60                                              |
| Defocus range (μm)                               |                                               | -0.1 to -5                                      |
| Pixel size (Å)                                   |                                               | 1.201                                           |
| Initial particle stack                           |                                               | 1,092,473                                       |
| Final particle stack                             |                                               | 81,519                                          |
| Map resolution (0.143 FSC threshold) (Å)         |                                               | 4.2                                             |
| Map B-factor                                     |                                               | 102.2                                           |
| Symmetry                                         |                                               | C1                                              |

983

984 **Table S2: X-ray crystallography data collection and refinement statistics.**

985

|                                                     | S2P6/SARS-CoV-2          |
|-----------------------------------------------------|--------------------------|
| <b>Data collection</b>                              |                          |
| Space group                                         | P6 <sub>5</sub> 22       |
| Cell dimensions                                     |                          |
| <i>a</i> , <i>b</i> , <i>c</i> (Å)                  | 92.64, 92.64, 223.41     |
| α, β, γ (°)                                         | 90.00, 90.00, 120.00     |
| Resolution (Å)                                      | 46.32-2.67 (2.80-2.67) * |
| <i>R</i> <sub>merge</sub>                           | 0.203 (3.714)            |
| <i>I</i> / σ <i>I</i>                               | 8.9 (0.6)                |
| Completeness (%)                                    | 99.0 (99.7)              |
| Redundancy                                          | 8.0 (8.4)                |
| <b>Refinement</b>                                   |                          |
| Resolution (Å)                                      | 2.67                     |
| No. reflections                                     | 16,392                   |
| <i>R</i> <sub>work</sub> / <i>R</i> <sub>free</sub> | 0.243/0.280              |
| No. atoms                                           |                          |
| Protein                                             | 3,054                    |
| Ligand/ion                                          | 26                       |
| Water                                               | 52                       |
| <i>B</i> -factors                                   |                          |
| Protein                                             | 88.37                    |
| Ligand/ion                                          | 87.00                    |
| Water                                               | 63.77                    |
| R.m.s. deviations                                   |                          |
| Bond lengths (Å)                                    | 0.002                    |
| Bond angles (°)                                     | 0.479                    |

986

987

**A**

| mAb    | HEAVY CHAIN |          |       |                          |                | LIGHT CHAIN |       |                          |                |    | Time point from disease onset |
|--------|-------------|----------|-------|--------------------------|----------------|-------------|-------|--------------------------|----------------|----|-------------------------------|
|        | IGHV        | IGHD     | IGHV  | CDR3-length (amino acid) | V identity (%) | IGLV        | IGLJ  | CDR3-length (amino acid) | V identity (%) |    |                               |
| S2P6   | V1-46*01    | D5-12*01 | J4*03 | 11                       | 95.14          | KV3-20*01   | K3*01 | 11                       | 97.52          | 46 |                               |
| S2S43  | V1-46*01    | D5-12*01 | J6*02 | 10                       | 96.53          | LV1-51*02   | J1*01 | 11                       | 94.74          | 39 |                               |
| P34D10 | V3-30*03    | D3-9*01  | J6*02 | 14                       | 90.28          | LV2-23*02   | J3*02 | 11                       | 97.22          | 43 |                               |
| P34G12 | V3-30*03    | D3-9*01  | J6*02 | 14                       | 87.85          | LV2-23*02   | J3*02 | 11                       | 94.10          | 43 |                               |
| P34E3  | V3-30*03    | D3-9*01  | J6*02 | 14                       | 86.46          | LV2-23*02   | J3*02 | 11                       | 95.14          | 43 |                               |

**B**

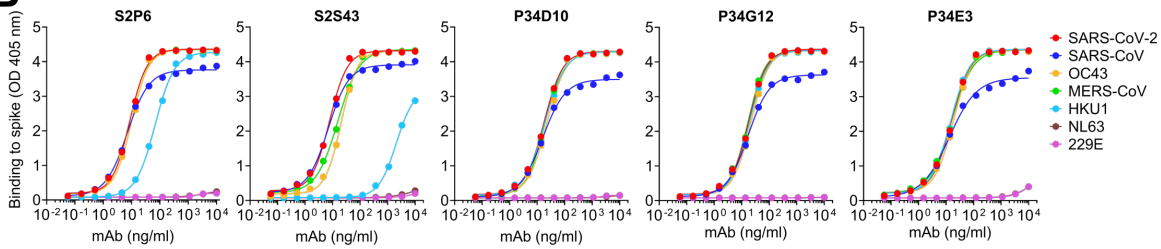

**C**

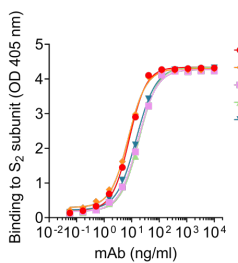

**D**

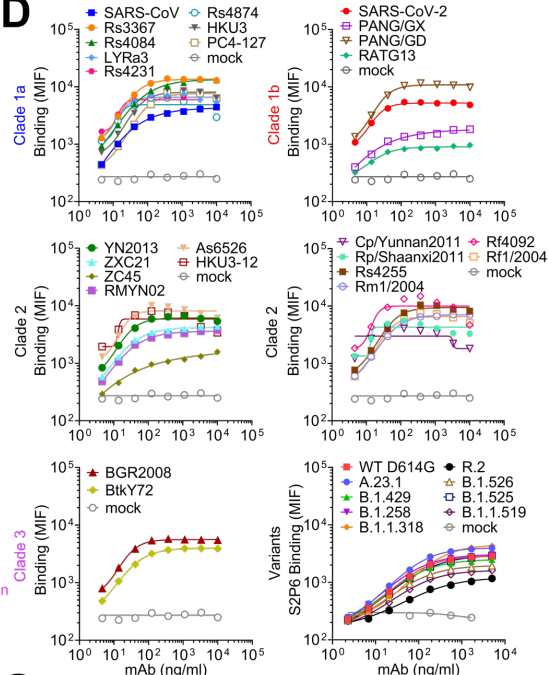

**E**

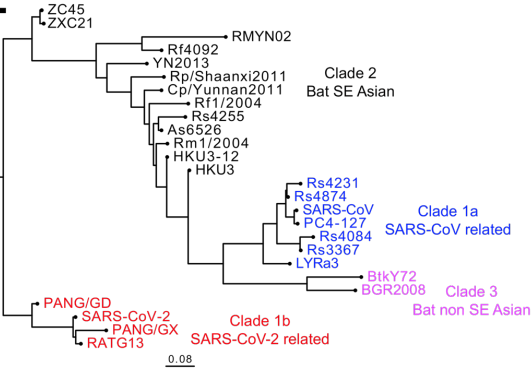

**F**

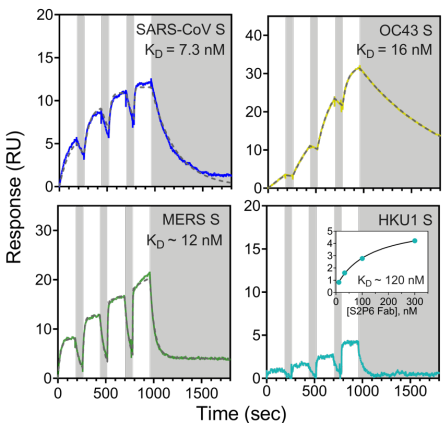

**G**

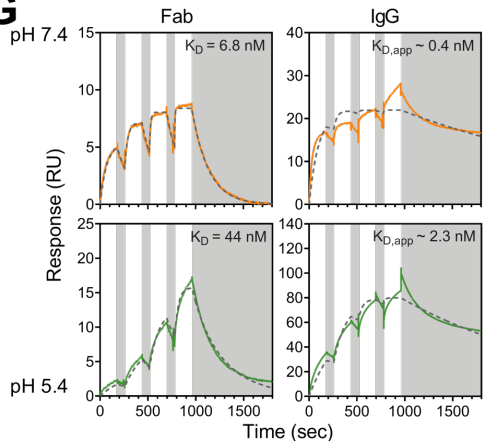

989 **Fig. S1. Properties of the 5 cross-reactive mAbs isolated.** (A) V(D)J usage, nucleotide  
990 sequence identity to germline genes, number of somatic mutations, and time interval between  
991 sample collection and mAb isolation. (B) Binding of identified mAbs to prefusion  $\beta$ -coronavirus S  
992 ectodomain trimers by ELISA (C) Binding to SARS-CoV-2 post-fusion S<sub>2</sub> subunit. (D) Mean  
993 fluorescence intensity as measured in flow cytometry for S2P6 binding to a panel of 26 S  
994 glycoproteins representative of all *sarbecovirus* clades and 8 SARS-CoV-2 variants. (E)  
995 Phylogenetic tree of sarbecoviruses S used in this work inferred via maximum likelihood analysis  
996 of spike amino acid sequences. (F) SPR analysis of S2P6 Fab binding to immobilized prefusion  
997  $\beta$ -coronavirus S trimers. (G) SPR analysis of S2P6 Fab and IgG binding to immobilized prefusion  
998 SARS-CoV-2 S ectodomain trimer at pH 7.4 and pH 5.4. Fits to a 1:1 binding model are an  
999 approximation for IgG binding due to bivalency.  
1000



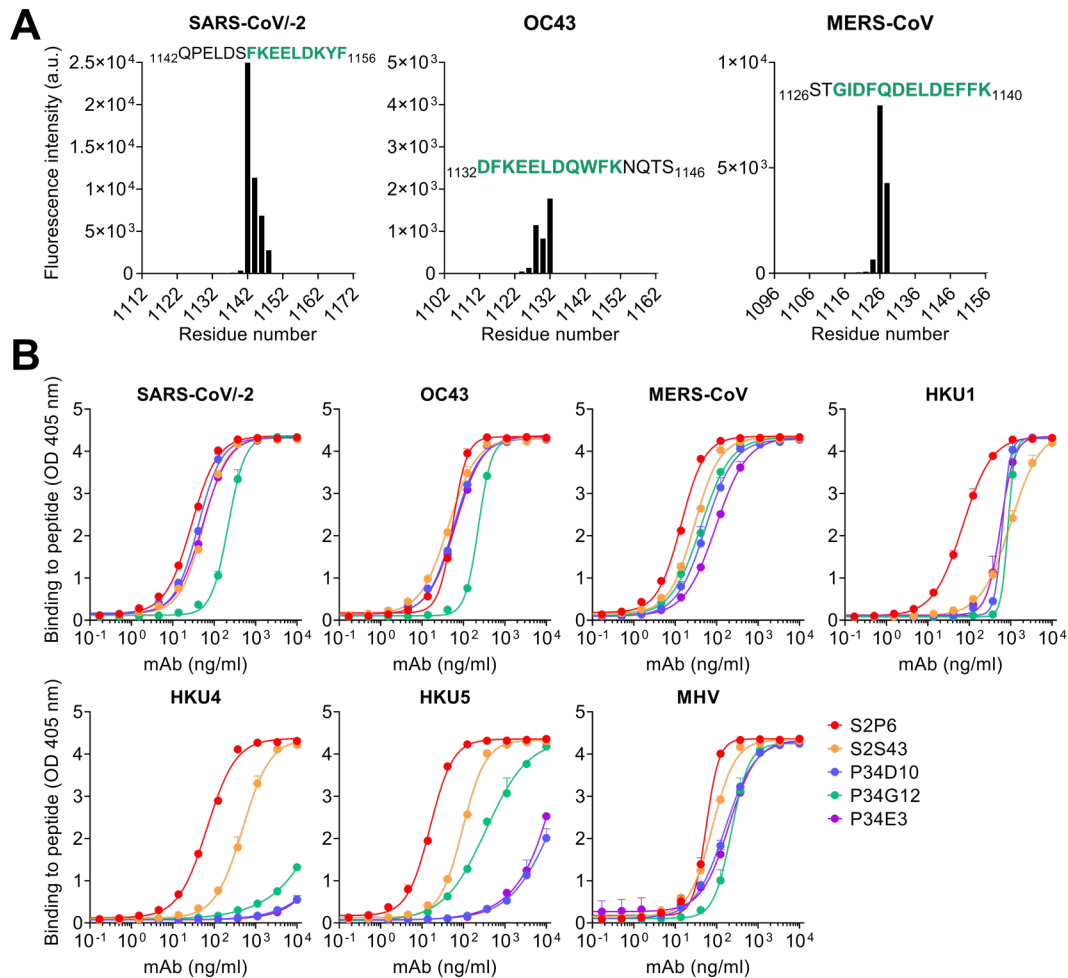

1001  
1002  
1003  
1004  
1005  
1006  
1007

**Fig. S2. Identification of the S2P6 epitope.** (A) Binding of S2P6 to linear peptides (15-mer peptides overlapping by 13 residues) spanning the SARS-CoV/SARS-CoV-2 S, OC43 S and MERS-CoV S sequences. (B) Binding of identified mAbs to  $\beta$ -coronavirus S stem helix peptides by ELISA.

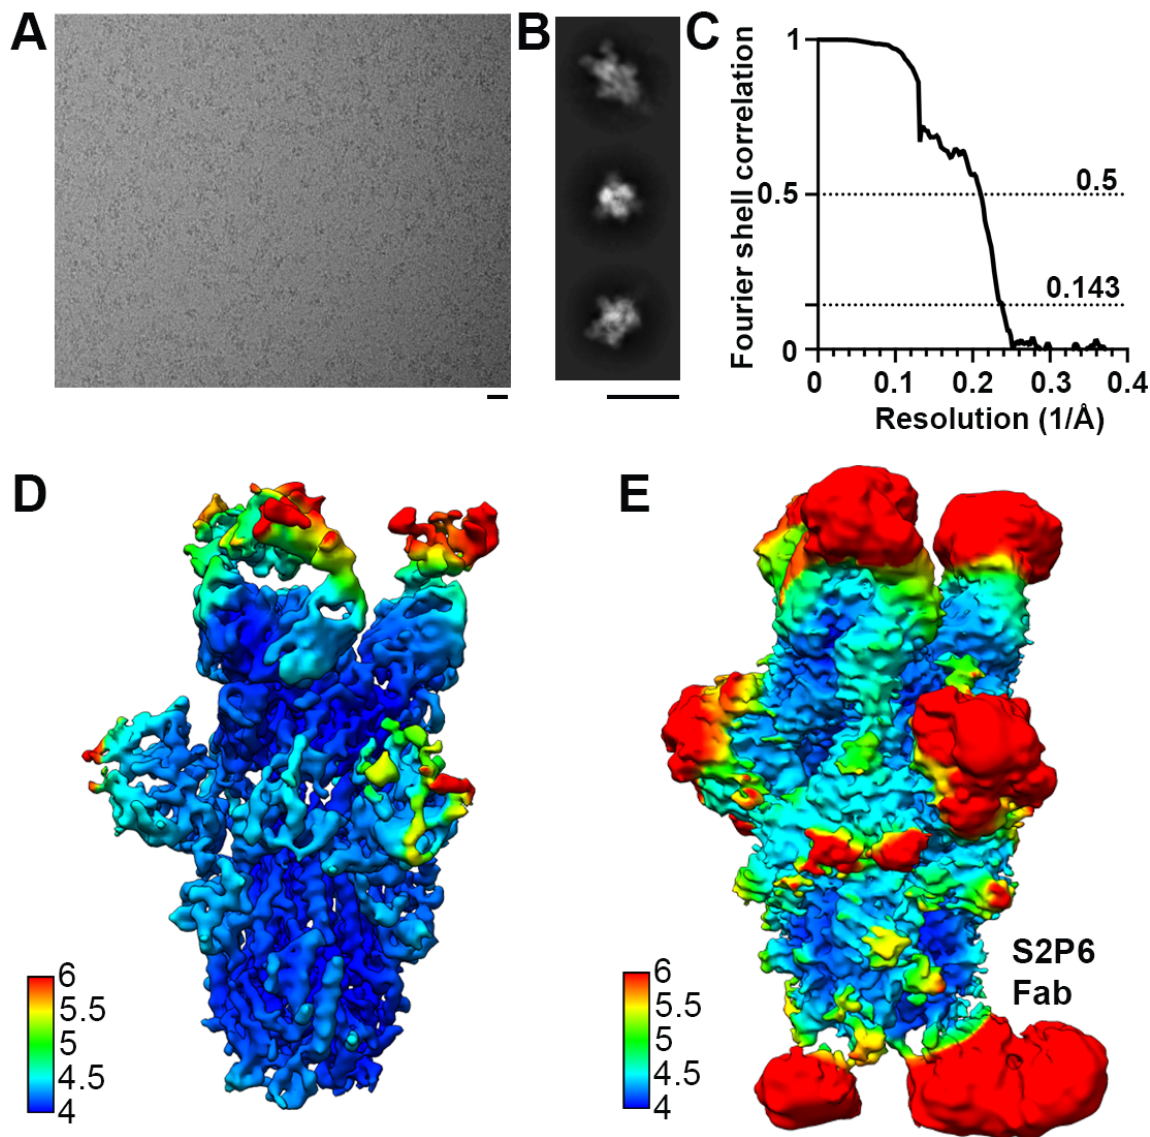

1008

**Fig. S3. CryoEM data processing and validation of S2P6- and S2M11-bound SARS-CoV-2 S dataset.** (A-B) Representative electron micrographs (A) and class averages (B) of SARS-CoV-2 S in complex with the S2P6 and S2M11 Fabs. Scale bars: 200 Å. (C) Gold-standard Fourier shell correlation curve. The 0.143 and 0.5 cut-offs are indicated by horizontal dashed gray lines. (D-E) CryoEM map colored by local resolution computed using cryoSPARC shown at two distinct contour levels.

1009

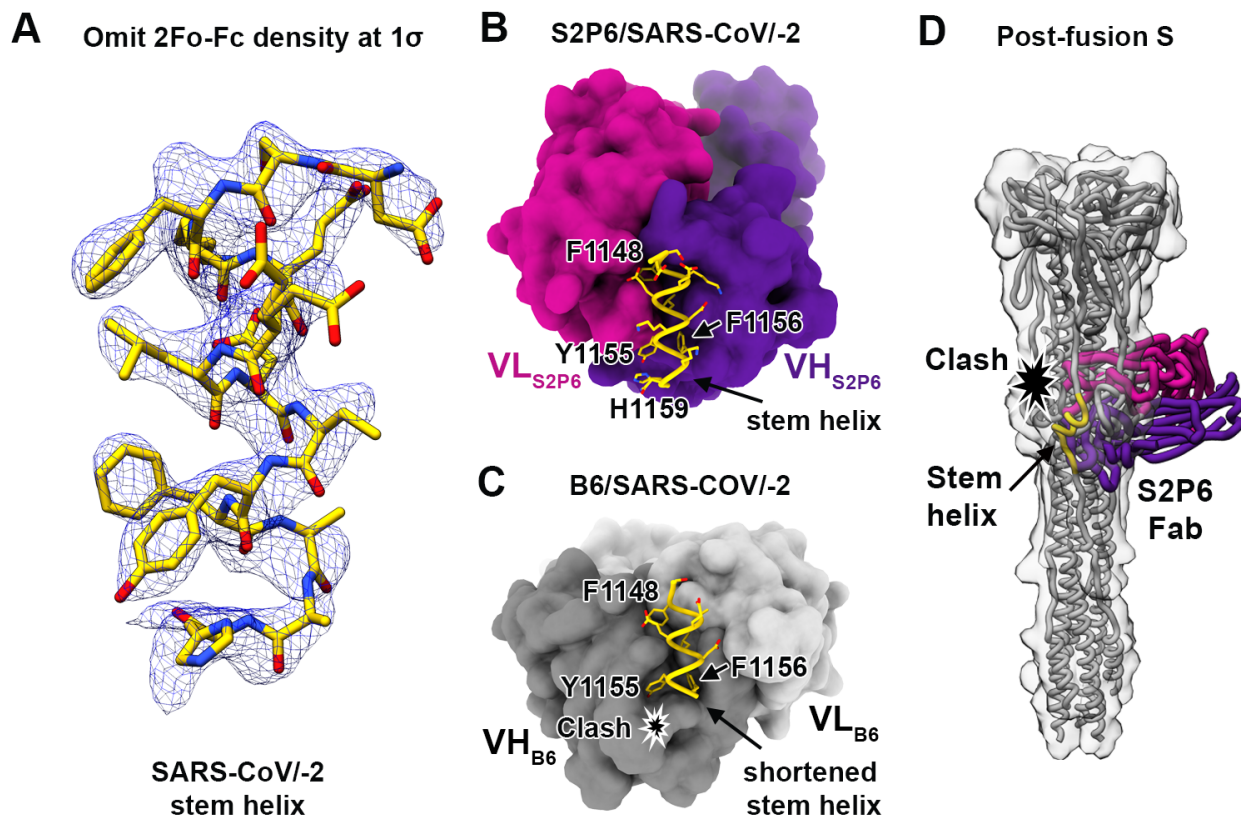

1010  
1011 **Fig. S4. Comparison of the S2P6 and B6 mAb binding modes.** (A) Crystal structure of the  
1012 SARS-CoV-2 stem helix peptide rendered as sticks with the corresponding 2Fo-Fc omit map  
1013 contoured at  $1.5\sigma$ . The S2P6 Fab fragment is not shown for clarity. (B) Crystal structure of the  
1014 S2P6 Fab (surface rendering) in complex with the SARS-CoV-2 S stem helix peptide (yellow  
1015 ribbon with side chains rendered as sticks). (C) Crystal structure of the B6 Fab (surface rendering)  
1016 in complex with the SARS-CoV-2 S stem helix peptide (yellow ribbon with side chains rendered  
1017 as sticks). The star indicates the putative clash between B6 CDRH2 and the stem helix C-  
1018 terminus, likely explaining the latter region is disordered in the B6-bound structure whereas it is  
1019 resolved in the S2P6-bound structure. (D) Superimposition of the S2P6-bound (purple/magenta)  
1020 SARS-CoV-2 stem helix (yellow) crystal structure onto the SARS-CoV S post-fusion structure  
1021 (PDB 6M3W) shows that S2P6 binding would be incompatible due to steric hindrance suggesting  
1022 S2P6 prevents S fusogenic conformational changes. A low-pass filtered surface generated from  
1023 the SARS-CoV S post-fusion structure is shown as a transparent gray surface to help visualizing  
1024 clashes.

1025  
1026

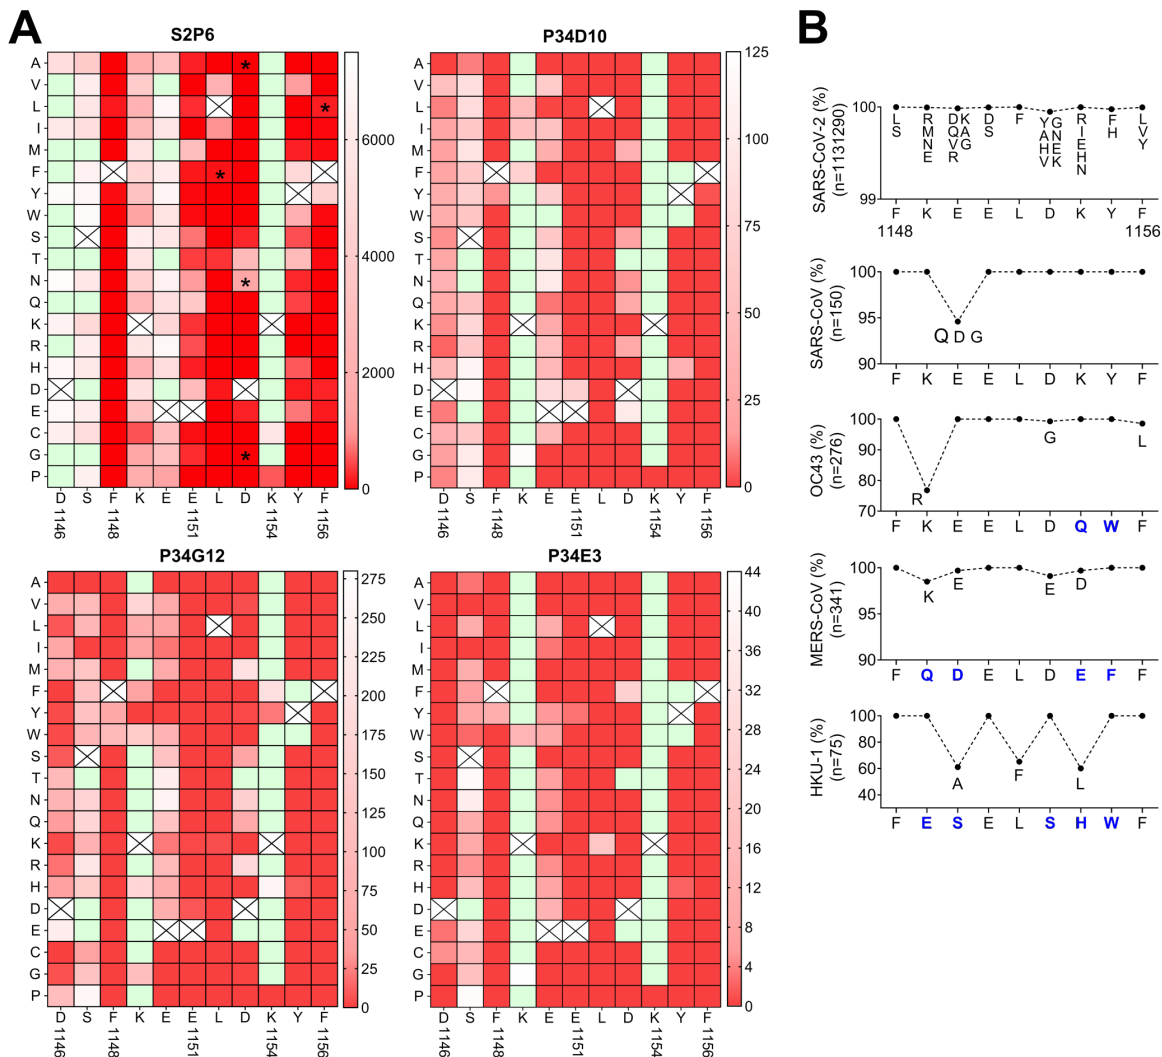

1027  
1028

1029 **Fig. S5. Impact of individual SARS-CoV-2 stem helix residue substitution on mAb binding.**  
 1030 **(A)** Heat map showing binding (fluorescence intensity) of S2P6, P34D10, P34G12 and P34E3 to  
 1031 stem helix peptides harboring each possible amino acid substitution. White to red gradient  
 1032 indicate the degree of loss of binding as compared to the native residue (white) shown as a  
 1033 crossed square. Green squares indicate substitutions enhancing binding as compared to the  
 1034 native residue. Asterisks highlight viral escape substitutions identified in vitro for S2P6. **(B)**  
 1035 Epitope conservation among  $\beta$ -coronavirus sequences with human and animal hosts retrieved  
 1036 from GISAID. The consensus sequence for SARS-CoV-2 is reported on x axis and predominant  
 1037 substitutions are indicated by a blue letter.

1038  
1039

**A**

| Convalescent donor demographics |                             |
|---------------------------------|-----------------------------|
| Participants                    | 72                          |
| Sex                             | Female 35                   |
|                                 | Male 37                     |
|                                 | N/A 3                       |
| Age                             | Average 50                  |
|                                 | Range 18-77                 |
| Days after symptom onset        |                             |
|                                 | Range 13-105                |
| Hospitalized                    | 15                          |
|                                 | Clinica Luganese Moncucco 3 |
|                                 | Luigi Sacco Hospital 12     |
| Symptomatic                     | 54                          |
|                                 | Clinica Luganese Moncucco 7 |
|                                 | Luigi Sacco Hospital 1      |
|                                 | Swiss volunteers 20         |
|                                 | US - San Francisco 26       |
| Asymptomatic                    | 6                           |
|                                 | Luigi Sacco Hospital 2      |
|                                 | Swiss volunteers 2          |
|                                 | US - San Francisco 2        |

| Vaccinated donor demographics |             |
|-------------------------------|-------------|
| Participants                  | 46          |
| Sex                           | Female 18   |
|                               | Male 28     |
| Age                           | Average 70  |
|                               | Range 28-91 |
| SARS-CoV-2                    | Naïve 37    |
|                               | Immune 7    |
| Vaccine                       | Dose 1 3    |
|                               | Dose 2 43   |

**B**

| Convalescent donor demographics |                            |
|---------------------------------|----------------------------|
| Participants                    | 21                         |
| Sex                             | Female 12                  |
|                                 | Male 9                     |
|                                 | N/A 0                      |
| Age                             | Average 41                 |
|                                 | Range 21-54                |
| Days after PCR positive test    |                            |
|                                 | Range 207-254              |
| Symptomatic                     | 10                         |
|                                 | Ente Ospedaliero Cantonale |
| Asymptomatic                    | 11                         |
|                                 | Ente Ospedaliero Cantonale |

1040

1041

1042 **Fig. S6. Patient demographics.** (A) Summary of convalescent patient demographics from which  
 1043 plasma (left table) or memory repertoire (right table) have been analyzed. (B) Summary of  
 1044 vaccinees patient demographics.

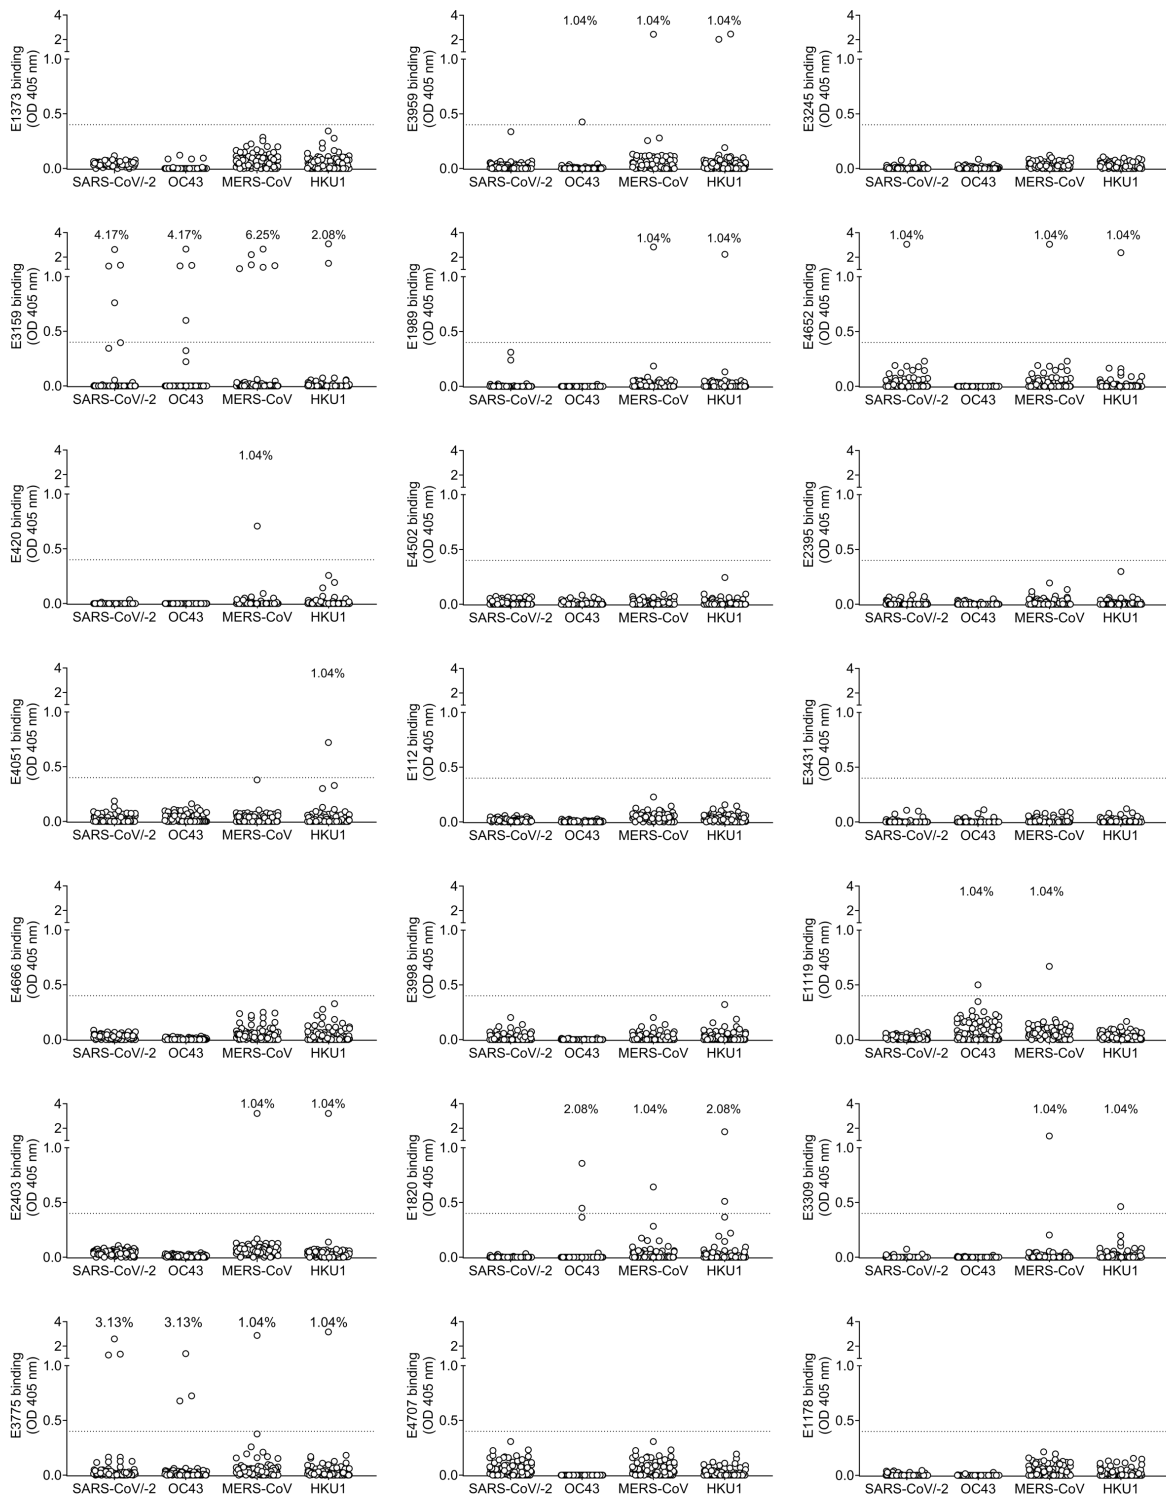

1045  
1046  
1047  
1048

**Fig. S7. Binding of IgG memory B-cells from COVID-19 convalescent individuals to  $\beta$ -coronavirus stem helix peptides.** Cut-off (OD=0.4) is indicated by a dotted line and frequencies of cultures scoring positive are reported for each antigen.

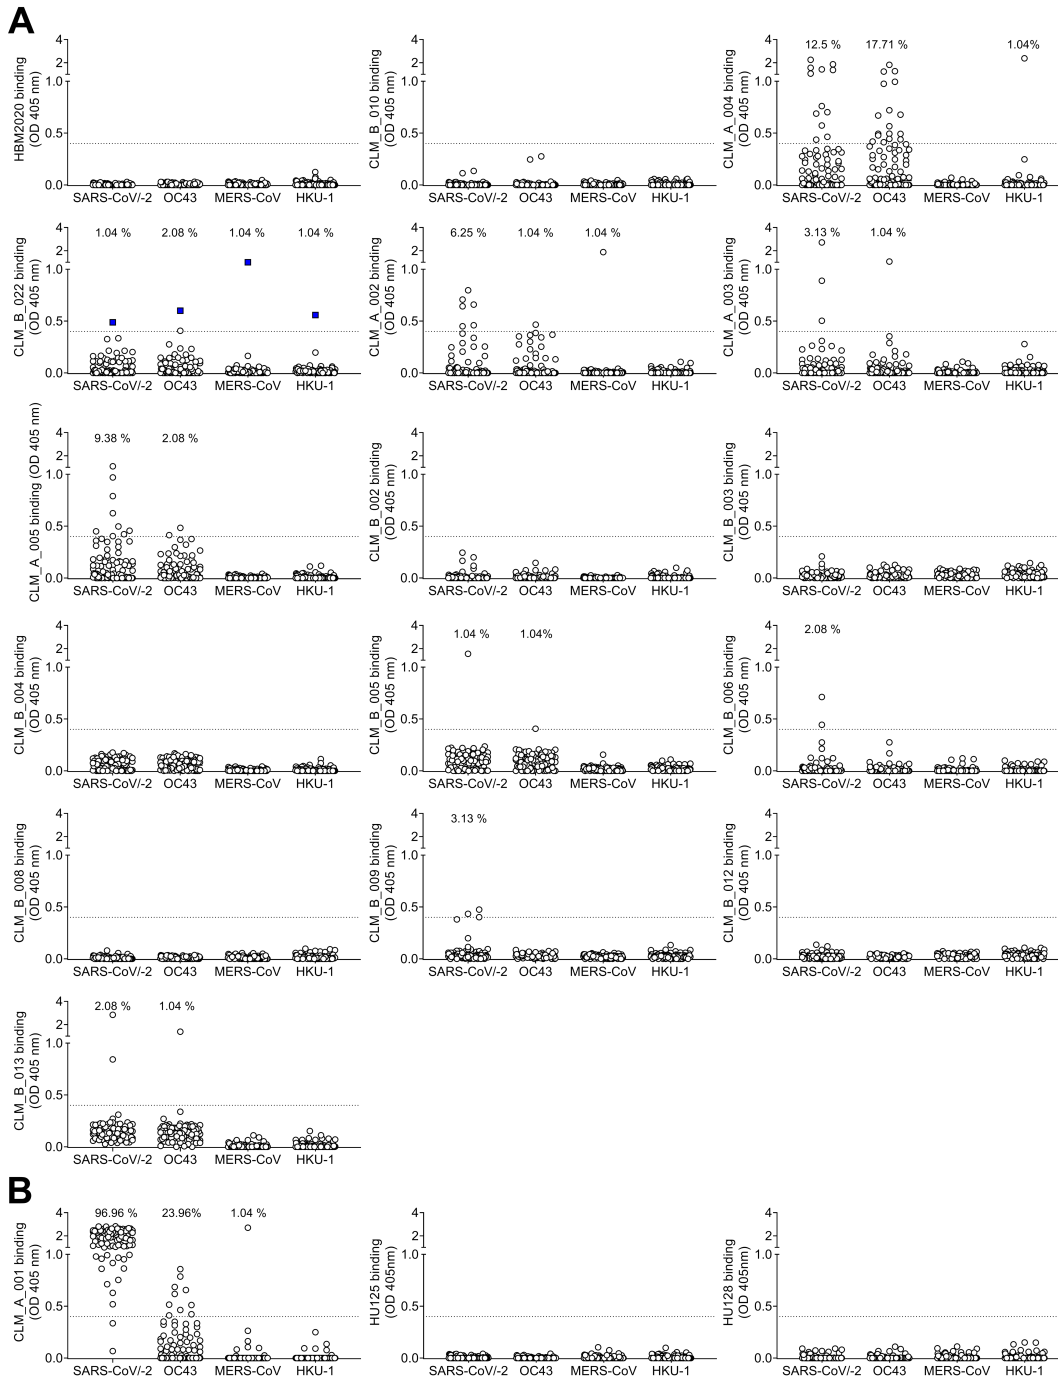

1049

1050

1051 **Fig. S8. Binding of IgG memory B-cells from COVID-19 vaccinees to  $\beta$ -coronavirus stem**

1052 **helix peptides. (A) Cut-off (OD=0.4) is indicated by a dotted line and frequencies of cultures**

1053 **scoring positive are reported for each antigen. (B) Binding to stem helix peptide of a previously**

1054 **infected individual after first vaccine dose showing high response to SARS-CoV-2 (left) and of**

1055 **two pre-pandemic individuals (middle and right).**

1056

1057

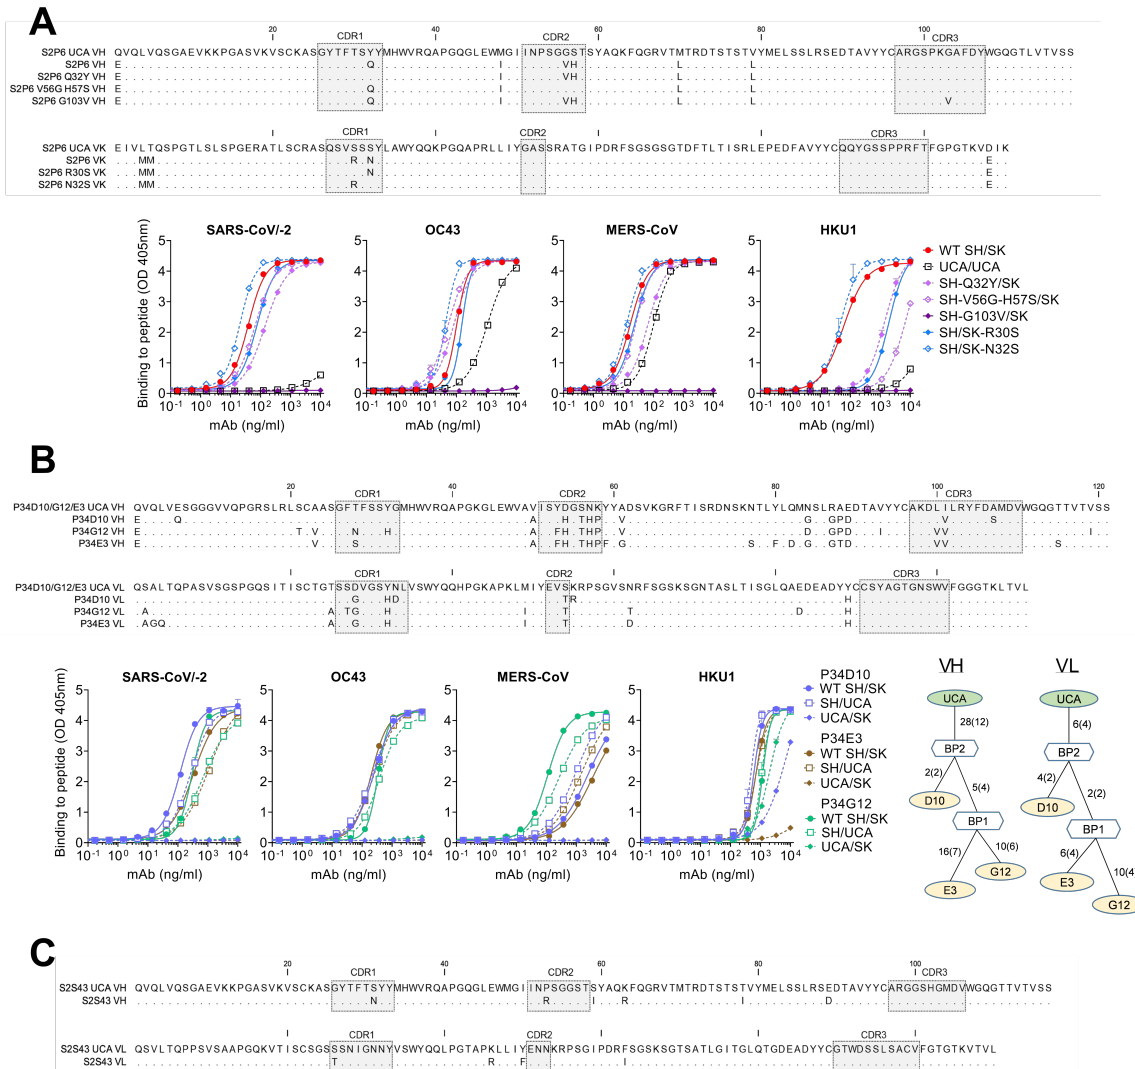

1058

1059

1060

1061

1062

1063

1064

1065

1066

1067

1068

1069

1070

**Fig. S9. Analysis of mAbs sequence.** (A) Alignment of the amino acid sequences of S2P6 UCA and wild-type VH and VL (top). The CDRs regions are highlighted in gray. Binding of S2P6 mutated SH or SK with fully germline reverted residues in CDR (bottom). (B) Alignment of the amino acid sequences of P34D10, P34G12 and P34E3 UCA and wild-type VH and VL (top). Binding of mAbs mature heavy chain paired with germline reverted light chain (SH/UCA) and germline reverted heavy chain paired with mature light chain (UCA/SK) (bottom). Genealogic trees of VH and VL genes of P34D10, P34G12 and P34E3 shown using Ancestry (81). The number of nucleotide and amino acid (in parentheses) mutations from the unmutated common ancestor (UCA) or branch points (BPs) to their descendants are shown. (C) Alignment of the amino acid sequences of S2S43 UCA and wild-type VH and VL



1071 **References:**

1072

1073 1. P. Zhou, X. L. Yang, X. G. Wang, B. Hu, L. Zhang, W. Zhang, H. R. Si, Y. Zhu, B. Li, C. L.  
1074 Huang, H. D. Chen, J. Chen, Y. Luo, H. Guo, R. D. Jiang, M. Q. Liu, Y. Chen, X. R. Shen,  
1075 X. Wang, X. S. Zheng, K. Zhao, Q. J. Chen, F. Deng, L. L. Liu, B. Yan, F. X. Zhan, Y. Y.  
1076 Wang, G. F. Xiao, Z. L. Shi, A pneumonia outbreak associated with a new coronavirus of  
1077 probable bat origin. *Nature* (2020), doi:10.1038/s41586-020-2012-7.

1078 2. M. A. Tortorici, D. Veessler, Structural insights into coronavirus entry. *Adv. Virus Res.* **105**,  
1079 93–116 (2019).

1080 3. A. C. Walls, Y. J. Park, M. A. Tortorici, A. Wall, A. T. McGuire, D. Veessler, Structure,  
1081 Function, and Antigenicity of the SARS-CoV-2 Spike Glycoprotein. *Cell.* **181**, 281-292.e6  
1082 (2020).

1083 4. D. Wrapp, N. Wang, K. S. Corbett, J. A. Goldsmith, C. L. Hsieh, O. Abiona, B. S. Graham,  
1084 J. S. McLellan, Cryo-EM structure of the 2019-nCoV spike in the prefusion conformation.  
1085 *Science.* **367**, 1260–1263 (2020).

1086 5. E. C. Thomson, L. E. Rosen, J. G. Shepherd, R. Spreafico, A. da Silva Filipe, J. A.  
1087 Wojcechowskyj, C. Davis, L. Piccoli, D. J. Pascall, J. Dillen, S. Lytras, N. Czudnochowski,  
1088 R. Shah, M. Meury, N. Jesudason, A. De Marco, K. Li, J. Bassi, A. O'Toole, D. Pinto, R. M.  
1089 Colquhoun, K. Culap, B. Jackson, F. Zatta, A. Rambaut, S. Jaconi, V. B. Sreenu, J. Nix, I.  
1090 Zhang, R. F. Jarrett, W. G. Glass, M. Beltramello, K. Nomikou, M. Pizzuto, L. Tong, E.  
1091 Cameroni, T. I. Croll, N. Johnson, J. Di Iulio, A. Wickenhagen, A. Ceschi, A. M. Harbison,  
1092 D. Mair, P. Ferrari, K. Smollett, F. Sallusto, S. Carmichael, C. Garzoni, J. Nichols, M. Galli,  
1093 J. Hughes, A. Riva, A. Ho, M. Schiuma, M. G. Semple, P. J. M. Openshaw, E. Fadda, J. K.  
1094 Baillie, J. D. Chodera, S. J. Rihn, S. J. Lycett, H. W. Virgin, A. Telenti, D. Corti, D. L.  
1095 Robertson, G. Snell, Circulating SARS-CoV-2 spike N439K variants maintain fitness while  
1096 evading antibody-mediated immunity. *Cell* (2021), doi:10.1016/j.cell.2021.01.037.

1097 6. M. McCallum, A. De Marco, F. A. Lempp, M. A. Tortorici, D. Pinto, A. C. Walls, M.  
1098 Beltramello, A. Chen, Z. Liu, F. Zatta, S. Zepeda, J. di Iulio, J. E. Bowen, M. Montiel-Ruiz,  
1099 J. Zhou, L. E. Rosen, S. Bianchi, B. Guarino, C. S. Fregni, R. Abdelnabi, S.-Y. Caroline  
1100 Foo, P. W. Rothlauf, L.-M. Bloyet, F. Benigni, E. Cameroni, J. Neyts, A. Riva, G. Snell, A.  
1101 Telenti, S. P. J. Whelan, H. W. Virgin, D. Corti, M. S. Pizzuto, D. Veessler, N-terminal  
1102 domain antigenic mapping reveals a site of vulnerability for SARS-CoV-2. *Cell* (2021),  
1103 doi:10.1016/j.cell.2021.03.028.

1104 7. K. R. McCarthy, L. J. Rennick, S. Nambulli, L. R. Robinson-McCarthy, W. G. Bain, G.  
1105 Haidar, W. P. Duprex, Recurrent deletions in the SARS-CoV-2 spike glycoprotein drive  
1106 antibody escape. *Science* (2021), doi:10.1126/science.abf6950.

1107 8. B. Choi, M. C. Choudhary, J. Regan, J. A. Sparks, R. F. Padera, X. Qiu, I. H. Solomon, H.  
1108 H. Kuo, J. Boucau, K. Bowman, U. D. Adhikari, M. L. Winkler, A. A. Mueller, T. Y. Hsu, M.  
1109 Desjardins, L. R. Baden, B. T. Chan, B. D. Walker, M. Lichterfeld, M. Brigl, D. S. Kwon, S.  
1110 Kanjilal, E. T. Richardson, A. H. Jonsson, G. Alter, A. K. Barczak, W. P. Hanage, X. G. Yu,  
1111 G. D. Gaiha, M. S. Seaman, M. Cernadas, J. Z. Li, Persistence and Evolution of SARS-  
1112 CoV-2 in an Immunocompromised Host. *N. Engl. J. Med.* (2020),  
1113 doi:10.1056/NEJMc2031364.

- 1114 9. Z. Liu, L. A. VanBlargan, L.-M. Bloyet, P. W. Rothlauf, R. E. Chen, S. Stumpf, H. Zhao, J.  
1115 M. Errico, E. S. Theel, M. J. Liebeskind, B. Alford, W. J. Buchser, A. H. Ellebedy, D. H.  
1116 Fremont, M. S. Diamond, S. P. J. Whelan, Identification of SARS-CoV-2 spike mutations  
1117 that attenuate monoclonal and serum antibody neutralization. *Cell Host Microbe* (2021),  
1118 doi:10.1016/j.chom.2021.01.014.
- 1119 10. Y. Weisblum, F. Schmidt, F. Zhang, J. DaSilva, D. Poston, J. C. C. Lorenzi, F. Muecksch,  
1120 M. Rutkowska, H.-H. Hoffmann, E. Michailidis, C. Gaebler, M. Agudelo, A. Cho, Z. Wang,  
1121 A. Gazumyan, M. Cipolla, L. Luchsinger, C. D. Hillyer, M. Caskey, D. F. Robbiani, C. M.  
1122 Rice, M. C. Nussenzweig, T. Hatzioannou, P. D. Bieniasz, Escape from neutralizing  
1123 antibodies by SARS-CoV-2 spike protein variants. *Elife*. **9**, e61312 (2020).
- 1124 11. A. C. Walls, X. Xiong, Y. J. Park, M. A. Tortorici, J. Snijder, J. Quispe, E. Cameroni, R.  
1125 Gopal, M. Dai, A. Lanzavecchia, M. Zambon, F. A. Rey, D. Corti, D. Veessler, Unexpected  
1126 Receptor Functional Mimicry Elucidates Activation of Coronavirus Fusion. *Cell*. **176**, 1026-  
1127 1039.e15 (2019).
- 1128 12. M. M. Sauer, M. A. Tortorici, Y.-J. Park, A. C. Walls, L. Homad, O. Acton, J. Bowen, C.  
1129 Wang, X. Xiong, W. de van der Schueren, J. Quispe, B. G. Hoffstrom, B.-J. Bosch, A. T.  
1130 McGuire, D. Veessler, Structural basis for broad coronavirus neutralization. *bioRxiv* (2020),  
1131 doi:10.1101/2020.12.29.424482.
- 1132 13. C. Wang, R. van Haperen, J. Gutiérrez-Álvarez, W. Li, N. M. A. Okba, I. Albulescu, I.  
1133 Widjaja, B. van Dieren, R. Fernandez-Delgado, I. Sola, D. L. Hurdiss, O. Daramola, F.  
1134 Grosveld, F. J. M. van Kuppeveld, B. L. Haagmans, L. Enjuanes, D. Drabek, B.-J. Bosch, A  
1135 conserved immunogenic and vulnerable site on the coronavirus spike protein delineated by  
1136 cross-reactive monoclonal antibodies. *Nat. Commun.* **12**, 1715 (2021).
- 1137 14. G. Song, W.-T. He, S. Callaghan, F. Anzanello, D. Huang, J. Ricketts, J. L. Torres, N.  
1138 Beutler, L. Peng, S. Vargas, J. Cassell, M. Parren, L. Yang, C. Ignacio, D. M. Smith, J. E.  
1139 Voss, D. Nemazee, A. B. Ward, T. Rogers, D. R. Burton, R. Andrabi, *bioRxiv*, in press.
- 1140 15. N. L. Kallewaard, D. Corti, P. J. Collins, U. Neu, J. M. McAuliffe, E. Benjamin, L. Wachter-  
1141 Rosati, F. J. Palmer-Hill, A. Q. Yuan, P. A. Walker, M. K. Vorlaender, S. Bianchi, B.  
1142 Guarino, A. De Marco, F. Vanzetta, G. Agatic, M. Foglierini, D. Pinna, B. Fernandez-  
1143 Rodriguez, A. Fruehwirth, C. Silacci, R. W. Ogradowicz, S. R. Martin, F. Sallusto, J. A.  
1144 Suzich, A. Lanzavecchia, Q. Zhu, S. J. Gamblin, J. J. Skehel, Structure and Function  
1145 Analysis of an Antibody Recognizing All Influenza A Subtypes. *Cell*. **166**, 596–608 (2016).
- 1146 16. B. F. Haynes, D. R. Burton, J. R. Mascola, Multiple roles for HIV broadly neutralizing  
1147 antibodies. *Sci. Transl. Med.* **11**, eaaz2686 (2019).
- 1148 17. M. Hoffmann, K. Mösbauer, H. Hofmann-Winkler, A. Kaul, H. Kleine-Weber, N. Krüger, N.  
1149 C. Gassen, M. A. Müller, C. Drosten, S. Pöhlmann, Chloroquine does not inhibit infection of  
1150 human lung cells with SARS-CoV-2. *Nature*. **585**, 588–590 (2020).
- 1151 18. M. Hoffmann, H. Kleine-Weber, S. Schroeder, N. Krüger, T. Herrler, S. Erichsen, T. S.  
1152 Schiergens, G. Herrler, N. H. Wu, A. Nitsche, M. A. Müller, C. Drosten, S. Pöhlmann,  
1153 SARS-CoV-2 Cell Entry Depends on ACE2 and TMPRSS2 and Is Blocked by a Clinically  
1154 Proven Protease Inhibitor. *Cell*. **181**, 271-280.e8 (2020).

- 1155 19. M. Hoffmann, H. Kleine-Weber, S. Pöhlmann, A Multibasic Cleavage Site in the Spike  
1156 Protein of SARS-CoV-2 Is Essential for Infection of Human Lung Cells. *Mol. Cell.* **78**, 779-  
1157 784.e5 (2020).
- 1158 20. Y. Kaname, H. Tani, C. Kataoka, M. Shiokawa, S. Taguwa, T. Abe, K. Moriishi, T.  
1159 Kinoshita, Y. Matsuura, Acquisition of complement resistance through incorporation of  
1160 CD55/decay-accelerating factor into viral particles bearing baculovirus GP64. *J. Virol.* **84**,  
1161 3210–3219 (2010).
- 1162 21. D. Pinto, Y. J. Park, M. Beltramello, A. C. Walls, M. A. Tortorici, S. Bianchi, S. Jaconi, K.  
1163 Culap, F. Zatta, A. De Marco, A. Peter, B. Guarino, R. Spreafico, E. Cameroni, J. B. Case,  
1164 R. E. Chen, C. Havenar-Daughton, G. Snell, A. Telenti, H. W. Virgin, A. Lanzavecchia, M.  
1165 S. Diamond, K. Fink, D. Veessler, D. Corti, Cross-neutralization of SARS-CoV-2 by a human  
1166 monoclonal SARS-CoV antibody. *Nature.* **583**, 290–295 (2020).
- 1167 22. M. A. Tortorici, M. Beltramello, F. A. Lempp, D. Pinto, H. V. Dang, L. E. Rosen, M.  
1168 McCallum, J. Bowen, A. Minola, S. Jaconi, F. Zatta, A. De Marco, B. Guarino, S. Bianchi,  
1169 E. J. Lauron, H. Tucker, J. Zhou, A. Peter, C. Havenar-Daughton, J. A. Wojcechowskyj, J.  
1170 B. Case, R. E. Chen, H. Kaiser, M. Montiel-Ruiz, M. Meury, N. Czudnochowski, R.  
1171 Spreafico, J. Dillen, C. Ng, N. Sprugasci, K. Culap, F. Benigni, R. Abdelnabi, S. C. Foo, M.  
1172 A. Schmid, E. Cameroni, A. Riva, A. Gabrieli, M. Galli, M. S. Pizzuto, J. Neyts, M. S.  
1173 Diamond, H. W. Virgin, G. Snell, D. Corti, K. Fink, D. Veessler, Ultrapotent human  
1174 antibodies protect against SARS-CoV-2 challenge via multiple mechanisms. *Science.* **370**,  
1175 950–957 (2020).
- 1176 23. J. B. Case, P. W. Rothlauf, R. E. Chen, Z. Liu, H. Zhao, A. S. Kim, L. M. Bloyet, Q. Zeng,  
1177 S. Tahan, L. Droit, M. X. G. Ilagan, M. A. Tartell, G. Amarasinghe, J. P. Henderson, S.  
1178 Miersch, M. Ustav, S. Sidhu, H. W. Virgin, D. Wang, S. Ding, D. Corti, E. S. Theel, D. H.  
1179 Fremont, M. S. Diamond, S. P. J. Whelan, Neutralizing Antibody and Soluble ACE2  
1180 Inhibition of a Replication-Competent VSV-SARS-CoV-2 and a Clinical Isolate of SARS-  
1181 CoV-2. *Cell Host Microbe.* **28**, 475-485.e5 (2020).
- 1182 24. M. Gui, W. Song, H. Zhou, J. Xu, S. Chen, Y. Xiang, X. Wang, Cryo-electron microscopy  
1183 structures of the SARS-CoV spike glycoprotein reveal a prerequisite conformational state  
1184 for receptor binding. *Cell Res.* **27**, 119–129 (2017).
- 1185 25. R. N. Kirchdoerfer, N. Wang, J. Pallesen, D. Wrapp, H. L. Turner, C. A. Cottrell, K. S.  
1186 Corbett, B. S. Graham, J. S. McLellan, A. B. Ward, Stabilized coronavirus spikes are  
1187 resistant to conformational changes induced by receptor recognition or proteolysis. *Sci.*  
1188 *Rep.* **8**, 15701 (2018).
- 1189 26. Y. Yuan, D. Cao, Y. Zhang, J. Ma, J. Qi, Q. Wang, G. Lu, Y. Wu, J. Yan, Y. Shi, X. Zhang,  
1190 G. F. Gao, Cryo-EM structures of MERS-CoV and SARS-CoV spike glycoproteins reveal  
1191 the dynamic receptor binding domains. *Nat. Commun.* **8**, 15092 (2017).
- 1192 27. A. C. Walls, M. A. Tortorici, J. Snijder, X. Xiong, B. J. Bosch, F. A. Rey, D. Veessler,  
1193 Tectonic conformational changes of a coronavirus spike glycoprotein promote membrane  
1194 fusion. *Proc. Natl. Acad. Sci. U. S. A.* **114**, 11157–11162 (2017).

- 1195 28. Y. Cai, J. Zhang, T. Xiao, H. Peng, S. M. Sterling, R. M. Walsh, S. Rawson, S. Rits-  
1196 Volloch, B. Chen, Distinct conformational states of SARS-CoV-2 spike protein. *Science*.  
1197 **369**, 1586–1592 (2020).
- 1198 29. X. Fan, D. Cao, L. Kong, X. Zhang, Cryo-EM analysis of the post-fusion structure of the  
1199 SARS-CoV spike glycoprotein. *Nat. Commun.* **11**, 3618 (2020).
- 1200 30. F. A. Lempp, L. Soriaga, M. Montiel-Ruiz, F. Benigni, J. Noack, Y.-J. Park, S. Bianchi, A. C.  
1201 Walls, J. E. Bowen, J. Zhou, H. Kaiser, M. Agostini, M. Meury, E. Dellota Jr, S. Jaconi, E.  
1202 Cameroni, H. W. Virgin, A. Lanzavecchia, D. Veessler, L. Purcell, A. Telenti, D. Corti,  
1203 Membrane lectins enhance SARS-CoV-2 infection and influence the neutralizing activity of  
1204 different classes of antibodies. *bioRxiv* (2021), , doi:10.1101/2021.04.03.438258.
- 1205 31. L. Piccoli, Y. J. Park, M. A. Tortorici, N. Czudnochowski, A. C. Walls, M. Beltramello, C.  
1206 Silacci-Fregni, D. Pinto, L. E. Rosen, J. E. Bowen, O. J. Acton, S. Jaconi, B. Guarino, A.  
1207 Minola, F. Zatta, N. Sprugasci, J. Bassi, A. Peter, A. De Marco, J. C. Nix, F. Mele, S. Jovic,  
1208 B. F. Rodriguez, S. V. Gupta, F. Jin, G. Piumatti, G. Lo Presti, A. F. Pellanda, M.  
1209 Biggiogero, M. Tarkowski, M. S. Pizzuto, E. Cameroni, C. Havenar-Daughton, M. Smithey,  
1210 D. Hong, V. Lepori, E. Albanese, A. Ceschi, E. Bernasconi, L. Elzi, P. Ferrari, C. Garzoni,  
1211 A. Riva, G. Snell, F. Sallusto, K. Fink, H. W. Virgin, A. Lanzavecchia, D. Corti, D. Veessler,  
1212 Mapping Neutralizing and Immunodominant Sites on the SARS-CoV-2 Spike Receptor-  
1213 Binding Domain by Structure-Guided High-Resolution Serology. *Cell*. **183**, 1024-1042.e21  
1214 (2020).
- 1215 32. A. Schäfer, F. Muecksch, J. C. C. Lorenzi, S. R. Leist, M. Cipolla, S. Bournazos, F.  
1216 Schmidt, R. M. Maison, A. Gazumyan, D. R. Martinez, R. S. Baric, D. F. Robbiani, T.  
1217 Hatzioannou, J. V. Ravetch, P. D. Bieniasz, R. A. Bowen, M. C. Nussenzweig, T. P.  
1218 Sheahan, Antibody potency, effector function, and combinations in protection and therapy  
1219 for SARS-CoV-2 infection in vivo. *J. Exp. Med.* **218** (2021), doi:10.1084/jem.20201993.
- 1220 33. S. Bournazos, T. T. Wang, J. V. Ravetch, The Role and Function of Fcγ Receptors on  
1221 Myeloid Cells. *Microbiol Spectr.* **4** (2016), doi:10.1128/microbiolspec.MCHD-0045-2016.
- 1222 34. S. Bournazos, D. Corti, H. W. Virgin, J. V. Ravetch, Fc-optimized antibodies elicit CD8  
1223 immunity to viral respiratory infection. *Nature*. **588**, 485–490 (2020).
- 1224 35. E. S. Winkler, P. Gilchuk, J. Yu, A. L. Bailey, R. E. Chen, S. J. Zost, H. Jang, Y. Huang, J.  
1225 D. Allen, J. B. Case, R. E. Sutton, R. H. Carnahan, T. L. Darling, A. C. M. Boon, M. Mack,  
1226 R. D. Head, T. M. Ross, J. E. Crowe, M. Diamond, *bioRxiv*, in press.
- 1227 36. R. Boudewijns, H. J. Thibaut, S. J. F. Kaptein, R. Li, V. Vergote, L. Seldeslachts, J. Van  
1228 Weyenbergh, C. De Keyzer, L. Bervoets, S. Sharma, L. Liesenborghs, J. Ma, S. Jansen, D.  
1229 Van Looveren, T. Vercruysse, X. Wang, D. Jochmans, E. Martens, K. Roose, D. De  
1230 Vlioger, B. Schepens, T. Van Buyten, S. Jacobs, Y. Liu, J. Martí-Carreras, B.  
1231 Vanmechelen, T. Wawina-Bokalanga, L. Delang, J. Rocha-Pereira, L. Coelmont, W. Chiu,  
1232 P. Leyssen, E. Heylen, D. Schols, L. Wang, L. Close, J. Matthijssens, M. Van Ranst, V.  
1233 Compennolle, G. Schramm, K. Van Laere, X. Saelens, N. Callewaert, G. Opdenakker, P.  
1234 Maes, B. Weynand, C. Cawthorne, G. Vande Velde, Z. Wang, J. Neyts, K. Dallmeier,  
1235 STAT2 signaling restricts viral dissemination but drives severe pneumonia in SARS-CoV-2  
1236 infected hamsters. *Nat. Commun.* **11**, 5838 (2020).

- 1237 37. J. Tan, B. K. Sack, D. Oyen, I. Zenklusen, L. Piccoli, S. Barbieri, M. Foglierini, C. S. Fregni,  
1238 J. Marcandalli, S. Jongo, S. Abdulla, L. Perez, G. Corradin, L. Varani, F. Sallusto, B. K. L.  
1239 Sim, S. L. Hoffman, S. H. I. Kappe, C. Daubenberger, I. A. Wilson, A. Lanzavecchia, A  
1240 public antibody lineage that potently inhibits malaria infection through dual binding to the  
1241 circumsporozoite protein. *Nat. Med.* **24**, 401–407 (2018).
- 1242 38. D. Pinna, D. Corti, D. Jarrossay, F. Sallusto, A. Lanzavecchia, Clonal dissection of the  
1243 human memory B-cell repertoire following infection and vaccination. *Eur. J. Immunol.* **39**,  
1244 1260–1270 (2009).
- 1245 39. C. Daniel, R. Anderson, M. J. Buchmeier, J. O. Fleming, W. J. Spaan, H. Wege, P. J.  
1246 Talbot, Identification of an immunodominant linear neutralization domain on the S2 portion  
1247 of the murine coronavirus spike glycoprotein and evidence that it forms part of complex  
1248 tridimensional structure. *J. Virol.* **67**, 1185–1194 (1993).
- 1249 40. H. Zhang, G. Wang, J. Li, Y. Nie, X. Shi, G. Lian, W. Wang, X. Yin, Y. Zhao, X. Qu, M.  
1250 Ding, H. Deng, Identification of an antigenic determinant on the S2 domain of the severe  
1251 acute respiratory syndrome coronavirus spike glycoprotein capable of inducing neutralizing  
1252 antibodies. *J. Virol.* **78**, 6938–6945 (2004).
- 1253 41. C. M. Poh, G. Carissimo, B. Wang, S. N. Amrun, C. Y. Lee, R. S. Chee, S. W. Fong, N. K.  
1254 Yeo, W. H. Lee, A. Torres-Ruesta, Y. S. Leo, M. I. Chen, S. Y. Tan, L. Y. A. Chai, S.  
1255 Kalimuddin, S. S. G. Kheng, S. Y. Thien, B. E. Young, D. C. Lye, B. J. Hanson, C. I. Wang,  
1256 L. Renia, L. F. P. Ng, Two linear epitopes on the SARS-CoV-2 spike protein that elicit  
1257 neutralising antibodies in COVID-19 patients. *Nat. Commun.* **11**, 2806 (2020).
- 1258 42. H. A. Elshabrawy, M. M. Coughlin, S. C. Baker, B. S. Prabhakar, Human monoclonal  
1259 antibodies against highly conserved HR1 and HR2 domains of the SARS-CoV spike  
1260 protein are more broadly neutralizing. *PLoS One.* **7**, e50366 (2012).
- 1261 43. Z. Zheng, V. M. Monteil, S. Maurer-Stroh, C. W. Yew, C. Leong, N. K. Mohd-Ismail, S.  
1262 Cheyyatraivendran Arularasu, V. T. K. Chow, R. T. P. Lin, A. Mirazimi, W. Hong, Y. J. Tan,  
1263 Monoclonal antibodies for the S2 subunit of spike of SARS-CoV-1 cross-react with the  
1264 newly-emerged SARS-CoV-2. *Euro Surveill.* **25** (2020), doi:10.2807/1560-  
1265 7917.ES.2020.25.28.2000291.
- 1266 44. A. C. Walls, M. A. Tortorici, B. J. Bosch, B. Frenz, P. J. M. Rottier, F. DiMaio, F. A. Rey, D.  
1267 Veessler, Cryo-electron microscopy structure of a coronavirus spike glycoprotein trimer.  
1268 *Nature.* **531**, 114–117 (2016).
- 1269 45. P. Zhou, M. Yuan, G. Song, N. Beutler, N. Shaabani, D. Huang, W.-T. He, X. Zhu, S.  
1270 Callaghan, P. Yong, F. Anzanello, L. Peng, J. Ricketts, M. Parren, E. Garcia, S. A.  
1271 Rawlings, D. M. Smith, D. Nemazee, J. R. Teijaro, T. F. Rogers, I. A. Wilson, D. R. Burton,  
1272 R. Andrabi, A protective broadly cross-reactive human antibody defines a conserved site of  
1273 vulnerability on beta-coronavirus spikes. *bioRxiv.org* (2021),  
1274 doi:10.1101/2021.03.30.437769.
- 1275 46. D. Corti, J. Voss, S. J. Gamblin, G. Codoni, A. Macagno, D. Jarrossay, S. G. Vachieri, D.  
1276 Pinna, A. Minola, F. Vanzetta, C. Silacci, B. M. Fernandez-Rodriguez, G. Agatic, S.  
1277 Bianchi, I. Giacchetto-Sasselli, L. Calder, F. Sallusto, P. Collins, L. F. Haire, N. Temperton,  
1278 J. P. Langedijk, J. J. Skehel, A. Lanzavecchia, A neutralizing antibody selected from

- 1279 plasma cells that binds to group 1 and group 2 influenza A hemagglutinins. *Science*. **333**,  
1280 850–856 (2011).
- 1281 47. D. J. DiLillo, G. S. Tan, P. Palese, J. V. Ravetch, Broadly neutralizing hemagglutinin stalk-  
1282 specific antibodies require FcγR interactions for protection against influenza virus in vivo.  
1283 *Nat. Med.* **20**, 143–151 (2014).
- 1284 48. D. Corti, A. L. Suguitan Jr, D. Pinna, C. Silacci, B. M. Fernandez-Rodriguez, F. Vanzetta,  
1285 C. Santos, C. J. Luke, F. J. Torres-Velez, N. J. Temperton, R. A. Weiss, F. Sallusto, K.  
1286 Subbarao, A. Lanzavecchia, Heterosubtypic neutralizing antibodies are produced by  
1287 individuals immunized with a seasonal influenza vaccine. *J. Clin. Invest.* **120**, 1663–1673  
1288 (2010).
- 1289 49. F. Sesterhenn, C. Yang, J. Bonet, J. T. Cramer, X. Wen, Y. Wang, C. I. Chiang, L. A.  
1290 Abriata, I. Kucharska, G. Castoro, S. S. Vollers, M. Galloux, E. Dheilly, S. Rosset, P.  
1291 Corthésy, S. Georgeon, M. Villard, C. A. Richard, D. Descamps, T. Delgado, E. Oricchio,  
1292 M. A. Rameix-Welti, V. Más, S. Ervin, J. F. Eléouët, S. Riffault, J. T. Bates, J. P. Julien, Y.  
1293 Li, T. Jardetzky, T. Krey, B. E. Correia, De novo protein design enables the precise  
1294 induction of RSV-neutralizing antibodies. *Science*. **368** (2020),  
1295 doi:10.1126/science.aay5051.
- 1296 50. M. L. Azoitei, B. E. Correia, Y. E. Ban, C. Carrico, O. Kalyuzhniy, L. Chen, A. Schroeter, P.  
1297 S. Huang, J. S. McLellan, P. D. Kwong, D. Baker, R. K. Strong, W. R. Schief, Computation-  
1298 guided backbone grafting of a discontinuous motif onto a protein scaffold. *Science*. **334**,  
1299 373–376 (2011).
- 1300 51. B. E. Correia, J. T. Bates, R. J. Loomis, G. Baneyx, C. Carrico, J. G. Jardine, P. Rupert, C.  
1301 Correnti, O. Kalyuzhniy, V. Vittal, M. J. Connell, E. Stevens, A. Schroeter, M. Chen, S.  
1302 Macpherson, A. M. Serra, Y. Adachi, M. A. Holmes, Y. Li, R. E. Klevit, B. S. Graham, R. T.  
1303 Wyatt, D. Baker, R. K. Strong, J. E. Crowe, P. R. Johnson, W. R. Schief, Proof of principle  
1304 for epitope-focused vaccine design. *Nature*. **507**, 201–206 (2014).
- 1305 52. A. C. Walls, B. Fiala, A. Schäfer, S. Wrenn, M. N. Pham, M. Murphy, L. V. Tse, L. Shehata,  
1306 M. A. O'Connor, C. Chen, M. J. Navarro, M. C. Miranda, D. Pettie, R. Ravichandran, J. C.  
1307 Kraft, C. Ogohara, A. Palser, S. Chalk, E. C. Lee, K. Guerriero, E. Kepl, C. M. Chow, C.  
1308 Sydeman, E. A. Hodge, B. Brown, J. T. Fuller, K. H. Dinnon, L. E. Gralinski, S. R. Leist, K.  
1309 L. Gully, T. B. Lewis, M. Guttman, H. Y. Chu, K. K. Lee, D. H. Fuller, R. S. Baric, P. Kellam,  
1310 L. Carter, M. Pepper, T. P. Sheahan, D. Veessler, N. P. King, Elicitation of Potent  
1311 Neutralizing Antibody Responses by Designed Protein Nanoparticle Vaccines for SARS-  
1312 CoV-2. *Cell*. **183**, 1367-1382.e17 (2020).
- 1313 53. A. C. Walls, M. C. Miranda, M. N. Pham, A. Schäfer, A. Greaney, P. S. Arunachalam, M.-J.  
1314 Navarro, M. A. Tortorici, K. Rogers, M. A. O'Connor, L. Shireff, D. E. Ferrell, N. Brunette, E.  
1315 Kepl, J. Bowen, S. K. Zepeda, T. Starr, C.-L. Hsieh, B. Fiala, S. Wrenn, D. Pettie, C.  
1316 Sydeman, M. Johnson, A. Blackstone, R. Ravichandran, C. Ogohara, L. Carter, S. W.  
1317 Tilles, R. Rappuoli, D. T. O'Hagan, R. Van Der Most, W. C. Van Voorhis, J. S. McLellan, H.  
1318 Kleanthous, T. P. Sheahan, D. H. Fuller, F. Villinger, J. Bloom, B. Pulendran, R. Baric, N.  
1319 King, D. Veessler, Elicitation of broadly protective sarbecovirus immunity by receptor-  
1320 binding domain nanoparticle vaccines. *bioRxivorg* (2021), doi:10.1101/2021.03.15.435528.

- 1321 54. S. Boyoglu-Barnum, D. Ellis, R. A. Gillespie, G. B. Hutchinson, Y.-J. Park, S. M. Moin, O. J.  
1322 Acton, R. Ravichandran, M. Murphy, D. Pettie, N. Matheson, L. Carter, A. Creanga, M. J.  
1323 Watson, S. Kephart, S. Ataca, J. R. Vaile, G. Ueda, M. C. Crank, L. Stewart, K. K. Lee, M.  
1324 Guttman, D. Baker, J. R. Mascola, D. Veessler, B. S. Graham, N. P. King, M. Kanekiyo,  
1325 Quadrivalent influenza nanoparticle vaccines induce broad protection. *Nature* (2021),  
1326 doi:10.1038/s41586-021-03365-x.
- 1327 55. M. Kanekiyo, C. J. Wei, H. M. Yassine, P. M. McTamney, J. C. Boyington, J. R. Whittle, S.  
1328 S. Rao, W. P. Kong, L. Wang, G. J. Nabel, Self-assembling influenza nanoparticle vaccines  
1329 elicit broadly neutralizing H1N1 antibodies. *Nature*. **499**, 102–106 (2013).
- 1330 56. M. Kanekiyo, M. G. Joyce, R. A. Gillespie, J. R. Gallagher, S. F. Andrews, H. M. Yassine,  
1331 A. K. Wheatley, B. E. Fisher, D. R. Ambrozak, A. Creanga, K. Leung, E. S. Yang, S.  
1332 Boyoglu-Barnum, I. S. Georgiev, Y. Tsybovsky, M. S. Prabhakaran, H. Andersen, W. P.  
1333 Kong, U. Baxa, K. L. Zephir, J. E. Ledgerwood, R. A. Koup, P. D. Kwong, A. K. Harris, A.  
1334 B. McDermott, J. R. Mascola, B. S. Graham, Mosaic nanoparticle display of diverse  
1335 influenza virus hemagglutinins elicits broad B cell responses. *Nat. Immunol.* **20**, 362–372  
1336 (2019).
- 1337 57. J. Marcandalli, B. Fiala, S. Ols, M. Perotti, W. de van der Schueren, J. Snijder, E. Hodge,  
1338 M. Benhaim, R. Ravichandran, L. Carter, W. Sheffler, L. Brunner, M. Lawrenz, P. Dubois,  
1339 A. Lanzavecchia, F. Sallusto, K. K. Lee, D. Veessler, C. E. Correnti, L. J. Stewart, D. Baker,  
1340 K. Lore, L. Perez, N. P. King, Induction of Potent Neutralizing Antibody Responses by a  
1341 Designed Protein Nanoparticle Vaccine for Respiratory Syncytial Virus. *Cell*. **176**, 1420-  
1342 1431 e17 (2019).
- 1343 58. M. A. Tortorici, N. Czudnochowski, T. N. Starr, R. Marzi, A. C. Walls, F. Zatta, J. E. Bowen,  
1344 S. Jaconi, J. di Iulio, Z. Wang, A. De Marco, S. K. Zepeda, D. Pinto, Z. Liu, M. Beltramello,  
1345 I. Bartha, M. P. Housley, F. A. Lempp, L. E. Rosen, E. Dellota, H. Kaiser, M. Montiel-Ruiz,  
1346 J. Zhou, A. Addetia, B. Guarino, K. Culap, N. Sprugasci, C. Saliba, E. Vetti, I. Giacchetto-  
1347 Sasselli, C. S. Fregni, R. Abdelnabi, S.-Y. C. Foo, C. Havenar-Daughton, M. A. Schmid, F.  
1348 Benigni, E. Cameroni, J. Neyts, A. Telenti, G. Snell, H. W. Virgin, S. P. J. Whelan, J. D.  
1349 Bloom, D. Corti, D. Veessler, M. S. Pizzuto, Structural basis for broad sarbecovirus  
1350 neutralization by a human monoclonal antibody. *bioRxiv* (2021),  
1351 doi:10.1101/2021.04.07.438818.
- 1352 59. M. A. Tortorici, A. C. Walls, Y. Lang, C. Wang, Z. Li, D. Koerhuis, G. J. Boons, B. J. Bosch,  
1353 F. A. Rey, R. J. de Groot, D. Veessler, Structural basis for human coronavirus attachment to  
1354 sialic acid receptors. *Nat. Struct. Mol. Biol.* **26**, 481–489 (2019).
- 1355 60. Y. J. Park, A. C. Walls, Z. Wang, M. M. Sauer, W. Li, M. A. Tortorici, B. J. Bosch, F.  
1356 DiMaio, D. Veessler, Structures of MERS-CoV spike glycoprotein in complex with sialoside  
1357 attachment receptors. *Nat. Struct. Mol. Biol.* **26**, 1151–1157 (2019).
- 1358 61. T. N. Starr, N. Czudnochowski, F. Zatta, Y.-J. Park, Z. Liu, A. Addetia, D. Pinto, M.  
1359 Beltramello, P. Hernandez, A. J. Greaney, R. Marzi, W. G. Glass, I. Zhang, A. S. Diggins,  
1360 J. E. Bowen, J. A. Wojcechowskyj, A. De Marco, L. E. Rosen, J. Zhou, M. Montiel-Ruiz, H.  
1361 Kaiser, H. Tucker, M. P. Housley, J. di Iulio, G. Lombardo, M. Agostini, N. Sprugasci, K.  
1362 Culap, S. Jaconi, M. Meury, E. Dellota, E. Cameroni, T. I. Croll, J. C. Nix, C. Havenar-  
1363 Daughton, A. Telenti, F. A. Lempp, M. S. Pizzuto, J. D. Chodera, C. M. Hebner, S. P. J.  
1364 Whelan, H. W. Virgin, D. Veessler, D. Corti, J. D. Bloom, G. Snell, Antibodies to the SARS-

- 1365 CoV-2 receptor-binding domain that maximize breadth and resistance to viral escape.  
1366 *bioRxiv*org (2021), doi:10.1101/2021.04.06.438709.
- 1367 62. A. M. Bolger, M. Lohse, B. Usadel, Trimmomatic: a flexible trimmer for Illumina sequence  
1368 data. *Bioinformatics*. **30**, 2114–2120 (2014).
- 1369 63. H. Li, Aligning sequence reads, clone sequences and assembly contigs with BWA-MEM.  
1370 *arXiv [q-bio.GN]* (2013), (available at <http://arxiv.org/abs/1303.3997>).
- 1371 64. A. Wilm, P. P. K. Aw, D. Bertrand, G. H. T. Yeo, S. H. Ong, C. H. Wong, C. C. Khor, R.  
1372 Petric, M. L. Hibberd, N. Nagarajan, LoFreq: a sequence-quality aware, ultra-sensitive  
1373 variant caller for uncovering cell-population heterogeneity from high-throughput sequencing  
1374 datasets. *Nucleic Acids Res.* **40**, 11189–11201 (2012).
- 1375 65. P. Cingolani, A. Platts, L. L. Wang, M. Coon, T. Nguyen, L. Wang, S. J. Land, X. Lu, D. M.  
1376 Ruden, A program for annotating and predicting the effects of single nucleotide  
1377 polymorphisms, SnpEff: SNPs in the genome of *Drosophila melanogaster* strain w1118;  
1378 iso-2; iso-3. *Fly (Austin)*. **6**, 80–92 (2012).
- 1379 66. B. S. Pedersen, A. R. Quinlan, Mosdepth: quick coverage calculation for genomes and  
1380 exomes. *Bioinformatics*. **34**, 867–868 (2018).
- 1381 67. P. Danecek, J. K. Bonfield, J. Liddle, J. Marshall, V. Ohan, M. O. Pollard, A. Whitwham, T.  
1382 Keane, S. A. McCarthy, R. M. Davies, H. Li, Twelve years of SAMtools and BCFtools.  
1383 *Gigascience*. **10** (2021), doi:10.1093/gigascience/giab008.
- 1384 68. P. Ewels, M. Magnusson, S. Lundin, M. Käller, MultiQC: summarize analysis results for  
1385 multiple tools and samples in a single report. *Bioinformatics*. **32**, 3047–3048 (2016).
- 1386 69. P. Di Tommaso, M. Chatzou, E. W. Floden, P. P. Barja, E. Palumbo, C. Notredame,  
1387 Nextflow enables reproducible computational workflows. *Nat. Biotechnol.* **35**, 316–319  
1388 (2017).
- 1389 70. B. Grüning, R. Dale, A. Sjödin, B. A. Chapman, J. Rowe, C. H. Tomkins-Tinch, R. Valieris,  
1390 J. Köster, Bioconda Team, Bioconda: sustainable and comprehensive software distribution  
1391 for the life sciences. *Nat. Methods*. **15**, 475–476 (2018).
- 1392 71. P. Emsley, B. Lohkamp, W. G. Scott, K. Cowtan, Features and development of Coot. *Acta*  
1393 *Crystallogr. D Biol. Crystallogr.* **66**, 486–501 (2010).
- 1394 72. T. I. Croll, ISOLDE: a physically realistic environment for model building into low-resolution  
1395 electron-density maps. *Acta Crystallogr D Struct Biol.* **74**, 519–530 (2018).
- 1396 73. G. N. Murshudov, P. Skubák, A. A. Lebedev, N. S. Pannu, R. A. Steiner, R. A. Nicholls, M.  
1397 D. Winn, F. Long, A. A. Vagin, REFMAC5 for the refinement of macromolecular crystal  
1398 structures. *Acta Crystallogr. D Biol. Crystallogr.* **67**, 355–367 (2011).
- 1399 74. C. Suloway, J. Pulokas, D. Fellmann, A. Cheng, F. Guerra, J. Quispe, S. Stagg, C. S.  
1400 Potter, B. Carragher, Automated molecular microscopy: the new Legion system. *J. Struct.*  
1401 *Biol.* **151**, 41–60 (2005).



- 1402 75. D. Tegunov, P. Cramer, Real-time cryo-electron microscopy data preprocessing with Warp.  
1403 *Nat. Methods*. **16**, 1146–1152 (2019).
- 1404 76. A. Punjani, J. L. Rubinstein, D. J. Fleet, M. A. Brubaker, cryoSPARC: algorithms for rapid  
1405 unsupervised cryo-EM structure determination. *Nat. Methods*. **14**, 290–296 (2017).
- 1406 77. J. Zivanov, T. Nakane, S. H. W. Scheres, A Bayesian approach to beam-induced motion  
1407 correction in cryo-EM single-particle analysis. *IUCrJ*. **6**, 5–17 (2019).
- 1408 78. S. Chen, G. McMullan, A. R. Faruqi, G. N. Murshudov, J. M. Short, S. H. Scheres, R.  
1409 Henderson, High-resolution noise substitution to measure overfitting and validate resolution  
1410 in 3D structure determination by single particle electron cryomicroscopy. *Ultramicroscopy*.  
1411 **135**, 24–35 (2013).
- 1412 79. E. F. Pettersen, T. D. Goddard, C. C. Huang, G. S. Couch, D. M. Greenblatt, E. C. Meng,  
1413 T. E. Ferrin, UCSF Chimera--a visualization system for exploratory research and analysis.  
1414 *J. Comput. Chem*. **25**, 1605–1612 (2004).
- 1415 80. L. J. Reed, H. Muench, A SIMPLE METHOD OF ESTIMATING FIFTY PER CENT  
1416 ENDPOINTS<sup>12</sup>. *Am. J. Epidemiol*. **27**, 493–497 (1938).
- 1417 81. M. Foglierini, L. Pappas, A. Lanzavecchia, D. Corti, L. Perez, AncesTree: An interactive  
1418 immunoglobulin lineage tree visualizer. *PLoS Comput. Biol*. **16**, e1007731 (2020).
